1 Topic modelling with ICD10-  
2 informed priors identifies novel  
3 genetic loci associated with  
4 multimorbidities in UK Biobank

5 Yidong Zhang<sup>1,2,3</sup>, Xilin Jiang<sup>1,4,5,6,7,8</sup>, Alexander J  
6 Mentzer<sup>1,5</sup>, Gil McVean<sup>1\*,#</sup>, Gerton Lunter<sup>9,10\*</sup>

7  
8 **Affiliations**

9 1 Big Data Institute, Li Ka Shing Centre for Health Information and Discovery, University of  
10 Oxford, Oxford OX3 7LF, UK

11 2 CAMS China Oxford Institute, Nuffield Department of Medicine, University of Oxford,  
12 Oxford OX3 7BN, UK

13 3 Department of Radiation Oncology, Peking Union Medical College Hospital, Chinese  
14 Academy of Medical Sciences and Peking Union Medical College, Beijing 100006, China

15 4 Department of Statistics, University of Oxford, Oxford OX1 3LB, UK

16 5 Wellcome Centre for Human Genetics, Nuffield Department of Medicine, University of  
17 Oxford, Oxford OX3 7BN, UK

18 6 Department of Epidemiology, Harvard T.H. Chan School of Public Health, Boston 02115,  
19 MA, USA

20 7 British Heart Foundation Cardiovascular Epidemiology Unit, Department of Public Health  
21 and Primary Care, University of Cambridge, Cambridge CB2 0SR, UK

22 8 Heart and Lung Research Institute, University of Cambridge, Cambridge CB2 0BB, UK

23 9 MRC Weatherall Institute of Molecular Medicine, John Radcliffe Hospital, University of  
24 Oxford, Oxford OX3 9DS, UK

25 10 Department of Epidemiology, University Medical Center Groningen, University of  
26 Groningen, Groningen 9700 RB, The Netherlands

27 \*These authors jointly supervised the work: [gil.mcvean@bdi.ox.ac.uk](mailto:gil.mcvean@bdi.ox.ac.uk), [g.a.lunter@umcg.nl](mailto:g.a.lunter@umcg.nl)

28 #Lead contact

29

## 30 Summary

31 Studies of disease incidence have identified thousands of genetic loci  
32 associated with complex traits. However, many diseases occur in combinations  
33 that can point to systemic dysregulation of underlying processes that affect  
34 multiple traits. We have developed a data-driven method for identifying such  
35 multimorbidities from routine healthcare data that combines topic modelling  
36 through Bayesian binary non-negative matrix factorization with an informative  
37 prior derived from the hierarchical ICD10 coding system. Through simulation  
38 we show that the method, treeLFA, typically outperforms both Latent Dirichlet  
39 Allocation (LDA) and topic modelling with uninformative priors in terms of  
40 inference accuracy and generalisation to test data, and is robust to moderate  
41 deviation between the prior and reality. By applying treeLFA to data from UK  
42 Biobank we identify a range of multimorbidity clusters in the form of disease  
43 topics ranging from well-established combinations relating to metabolic  
44 syndrome, arthropathies and cancers, to other less well-known ones, and a  
45 disease-free topic. Through genetic association analysis of inferred topic  
46 weights (topic-GWAS) and single diseases we find that topic-GWAS typically  
47 finds a much smaller, but only partially-overlapping, set of variants compared to  
48 GWAS of constituent disease codes. We validate the genetic loci (only)  
49 associated with topics through a range of approaches. Particularly, with the  
50 construction of PRS for topics, we find that compared to LDA, treeLFA  
51 achieves better prediction performance on independent test data. Overall, our  
52 findings indicate that topic models are well suited to characterising  
53 multimorbidity patterns, and different topic models have their own unique  
54 strengths. Moreover, genetic analysis of multimorbidity patterns can provide  
55 insight into the aetiology of complex traits that cannot be determined from the  
56 analysis of constituent traits alone.

57

## 58 Key words

59 Multimorbidity, topic modelling, treeLFA, topic-GWAS, UK Biobank

60

61

## 62 Introduction

63 Multimorbidity, defined as the co-existence of multiple chronic conditions, is a major challenge  
64 for modern healthcare systems. Its prevalence has increased because of a worldwide increase  
65 in life expectancy<sup>1-3</sup>, and it is associated with substantially lower quality of life<sup>3,4</sup>, worse clinical  
66 outcomes<sup>3</sup>, and increased healthcare expenditure<sup>5</sup>. The management of multimorbidity is  
67 challenging given that most guidelines and research are still targeted at single diseases. As a  
68 result, the negative impact of multimorbidity is often greater than the additive effects of  
69 individual diseases<sup>6</sup>.

70 Several common multimorbidity patterns, such as a cluster composed of cardiovascular and  
71 mental health disorders, and a musculoskeletal disease cluster, have been identified from  
72 literature reviews<sup>3,7</sup>. In recent years, the widespread adoption of electronic health records  
73 (EHR) has enabled the systematic study of multimorbidity, and a variety of approaches have  
74 been employed for this purpose, including factor analysis<sup>8</sup>, clustering<sup>9</sup>, graph or network  
75 based methods<sup>10,11</sup>, and statistical models such as latent class analysis<sup>12-14</sup>. These  
76 approaches have both validated the previously identified multimorbidity patterns<sup>12,14,15</sup> and,  
77 through the inclusion of a wider range of diseases, identified additional multimorbidity patterns  
78<sup>14,16</sup>. In addition, downstream analyses enabled by these approaches have helped to identify  
79 the clinical events and outcomes associated with specific multimorbidity patterns<sup>13,17</sup>, which  
80 may provide insights about early intervention and risk stratification for patients.

81 The existence of common multimorbidity patterns raises the question of their etiology. One  
82 way to approach this question is to analyse multimorbidity patterns together with appropriate  
83 -omics data to determine the biological pathways involved. These analyses have been made  
84 possible with the establishment of biobanks linking individuals' biological samples and genetic  
85 information to their EHR<sup>18-20</sup>. A recent study investigating genome-wide association studies  
86 (GWAS) of 439 common diseases recorded in UK biobank (UKB) hospital inpatient data found  
87 that 46% multimorbidity disease pairs have evidence for shared genetics<sup>11</sup>, suggesting that  
88 this may be a fruitful approach.

89 Intrinsic to the study of multimorbidity is the joint analysis of multiple disease phenotypes. To  
90 enable this, various multi-trait GWAS methods have been developed which promise to better  
91 exploit the deep phenotype data available for individuals in biobanks. These methods can be  
92 subdivided based on their analytical approaches. Univariate methods combine signals from  
93 single-trait GWAS<sup>21-27</sup>, while multivariate methods offer improved power by directly modelling  
94 the individual level genotype and phenotype data<sup>28-33</sup>. Several of these methods use  
95 transformations such as principal components analysis (PCA) on the original traits before  
96 association analysis so that very large numbers of traits can be handled. Topic models such  
97 as Latent Dirichlet Allocation (LDA) and Non-negative Matrix Factorization (NMF) were  
98 dimension reduction algorithms developed to model word occurrence in text documents, and  
99 have subsequently found application in biological studies to extract complex patterns from  
100 high-dimensional data<sup>34-36</sup>. They can be used to find multimorbidity clusters from diagnostic  
101 data, by viewing individuals as "documents" and diseases as "words". The topics learnt by

102 these models then are mathematical representations of groups of diseases that tend to co-  
103 occur within the same individual<sup>37</sup>. Earlier studies have shown that joining single diseases  
104 into topics increases statistical power for genetic discovery, and helps to disentangle the  
105 pleiotropic effects of several known genetic loci<sup>38–40</sup>.

106 Despite these advances, existing methods all have limitations. First, diagnostic data is often  
107 binary in nature, with zeros and ones representing the absence and presence of diseases, yet  
108 topic models like LDA and NMF were designed for count data, while algorithms designed for  
109 binary data<sup>41</sup> have not found wide application in biomedical studies. Second, biobank data is  
110 often sparse and, particularly for less common diseases, inclusion of prior domain knowledge  
111 may well improve results. Domain knowledge has been used successfully in topic models<sup>42,43</sup>,  
112 and, for example, medical ontologies like the ICD-10 disease classification system could serve  
113 as prior for disease co-occurrence, as they encode the complex relationships of diseases as  
114 a hierarchical structure which is amenable to mathematical analysis<sup>44–46</sup>. Third, while for  
115 statistical models, such as LDA, principled approaches exist for selecting the number of  
116 clusters and optimising other hyperparameters<sup>47–51</sup>, this is often not true for other methods,  
117 and these choices can strongly impact the final results<sup>9,52</sup>. In addition, methods not based on  
118 statistical foundations typically lack estimates of uncertainty in the inferred clusters, which  
119 makes interpretation difficult.

120 Here, we develop and validate an analytic framework for the study of multimorbidity using topic  
121 models and multi-trait GWAS on biobank datasets. Central to our approach is “treeLFA” (latent  
122 factor allocation with a tree-structured prior), a statistical model to identify multimorbidity  
123 clusters of common diseases based on co-occurrence patterns and an informed prior derived  
124 from a tree-structured disease ontology. Applying treeLFA to Hospital Episode Statistics (HES)  
125 data extracted from UKB we gain insights about the relationships of diseases and their shared  
126 genetic components. We identify multimorbidity clusters in the form of disease “topics” and  
127 show that these agree with accepted medical understanding. Performing a series of GWAS  
128 on the quantitative traits defined by individuals’ weights for these topics (topic-GWAS), we  
129 show that the approach identifies novel loci that correlate in expected ways with several  
130 genomic annotations. We validate the topic-GWAS results using test data, and show that  
131 topic-GWAS can improve genetic risk prediction for multiple disorders, in particular immune  
132 disorders, and those for which currently few associated loci are known.

133

134

## 135 Results

### 136 Overview of treeLFA

137 treeLFA is a topic model designed to identify multimorbidity clusters from binary disease  
138 diagnosis data. We describe the model in terms of the associated generative process. To  
139 generate data, first topic vectors  $\phi_k$  containing disease probabilities, and a topic weight vector  
140  $\theta_d$  for each individual  $d$  are sampled from a prior distribution. An individual's disease  
141 probabilities are given by a mixture of different topic vectors, with the topic weights ( $\theta_d$ ) acting  
142 as mixing proportions. The model can equivalently be defined by the likelihood for  
143 observations, which involves factoring a latent matrix of disease probabilities:

$$144 \quad P(W|\theta, \Phi) = \prod_{d,s} \text{Bernoulli}(W_{d,s} | [\theta \Phi]_{d,s})$$

145 Here,  $W$  is the binary input matrix recording individuals' diagnosed diseases, with rows  
146 representing individuals and columns representing disease codes;  $P(W_{d,s}=1)$  is the  
147 probability of disease  $s$  being 1 (diagnosed) for individual  $d$ .  $\phi$  is the topic-disease matrix  
148 (each row a topic and each column a disease), and  $\theta$  the topic weights matrix (each row an  
149 individual and each column a topic). The occurrence of disease  $s$  for individual  $d$  is modelled  
150 with a Bernoulli distribution parameterized by the corresponding entry in the product of  
151 matrices  $\theta$  and  $\phi$ :  $[\theta \Phi]_{d,s}$ . This model differs from LDA in three ways. First, LDA samples  
152 diseases (or words) according to a multinomial distribution, so that diseases can occur  
153 multiple times, while treeLFA only allows presence or absence. Second, LDA conditions on  
154 the number of observed diseases, whereas for treeLFA the number of diseases is  
155 informative. Third, treeLFA uses an informative prior on topic vectors  $\phi_k$  guided by a tree-  
156 structured ontology such as ICD-10 (Figure 1 in the analytic note). This prior has the  
157 property that diseases that are closely related on the tree tend to have correlated  
158 probabilities. Inference on the treeLFA model is performed using partially collapsed Gibbs  
159 sampling<sup>53</sup>, integrating out the topic weight variable. See the analytic note for more details,  
160 including on hyperparameter optimization.

161

### 162 Validation of treeLFA; Comparison with related topic models

163 We assessed treeLFA's performance in a simulation experiment, comparing it to the same  
164 model but without an informative tree prior (flatLFA; Fig 2a), and to LDA. We designed the  
165 simulation to test the model with respect to the degree of multimorbidity in the data; the size  
166 of the data; and the correctness of the prior. The degree of multimorbidity was governed by  $\alpha$ ,  
167 the concentration parameter of the Dirichlet prior for the topic weight variable  $\theta$ , with large  
168 values corresponding to the presence of several multimorbidity clusters in individuals, and  
169 small values resulting in individuals mainly presenting diseases from a single cluster. To test  
170 the influence of prior misspecification we used two sets of topics for simulation. In one set  
171 ("correct tree prior") the active disease codes in topics were aligned with the tree structure of  
172 disease codes, resulting in a high likelihood under the prior, which specifies that child nodes  
173 on the tree tend to (though not exclusively) have the same activity as their parent nodes (Fig  
174 2b,c). In the other setting ("incorrect tree prior") the pattern of active disease codes in topics

175 was possible but unlikely under the prior (Supplementary Fig 1a,b). For each set of topics we  
176 considered four combinations of  $D$  and  $\alpha$ , resulting in eight parameter combinations in total  
177 (Supplementary Table 1). For each of these we generated 20 data sets. To evaluate the  
178 performance of treeLFA, flatLFA and LDA we used two metrics: the accuracy of the inferred  
179 topic ( $\Delta\phi$ , average absolute per-disease difference in probability between aligned true and  
180 inferred topics; see Methods for details), and  $R_{pi}$ , the ratio of the average per-individual  
181 predictive test likelihood for treeLFA and flatLFA.

182 Both metrics indicate that on data simulated using the correct tree prior, treeLFA performs  
183 better than flatLFA, which does not have the benefit of an informative prior (Figures 2d-g,  
184 Supplementary Table 2). This is most pronounced for small datasets with strong  
185 multimorbidity (Figure 2d;  $\Delta\phi$   $0.012\pm 0.004$  (treeLFA) and  $0.025\pm 0.010$  (flatLFA);  $R_{pi}$   
186  $1.003\pm 0.002$ ), while for larger datasets, the two models show similar performance and the  
187 prior has less influence (Figure 2e;  $\Delta\phi$   $0.009\pm 0.006$  (treeLFA) and  $0.011\pm 0.005$  (flatLFA)).  
188 treeLFA outperforms LDA except for large data sets with weak multimorbidity (Figure 2g;  $\Delta\phi$   
189  $0.0100\pm 0.0009$  (treeLFA) and  $0.0084\pm 0.0021$  (LDA)) where both models gave accurate  
190 inference. For simulation using incorrect tree priors, flatLFA gave results comparable to  
191 simulation with correct priors, and the performance of flatLFA and treeLFA is similar across  
192 the four parameter combinations (Supplementary Figure 1), indicating that treeLFA is robust  
193 against prior misspecification. Overall, these results indicate that both treeLFA and flatLFA  
194 give accurate results when sufficient training data is available, even if treeLFA's informative  
195 prior is inaccurate; but when the tree prior is correct, treeLFA performs better than flatLFA,  
196 particularly when training data is limited. Even in larger real-world data sets, low-frequency  
197 topics will have limited training data, hence this suggests that treeLFA could add power to the  
198 analysis of multimorbidity in biobank data.

199

## 200 Topics of ICD-10 codes inferred from UK Biobank data

201 To investigate the properties of treeLFA on real-world data, we built an exploratory data set  
202 using the HES data in UKB from 502,413 individuals, consisting of the 100 most frequent  
203 codes from chapters 1-13 of the ICD-10 coding system (top-100 UKB dataset, Supplementary  
204 Table 3). We split these data randomly into training (80%) and testing (20%) datasets, and  
205 trained treeLFA with an initial  $K=11$  topics (There is a discussion of the optimal number of  
206 topics below).

207 The inferred topics include an “empty” topic, in which all codes have near-zero probability of  
208 occurring (Figure 3a, Supplementary Table 4). Its associated entry in the optimal Dirichlet prior  
209 parameter  $\alpha$  is very large (0.585) compared to that of other topics (0.016-0.06), indicating that  
210 the empty topic is frequently assigned to an individuals' disease profile. The remaining topics  
211 all contain active codes. Most topics are sparse (8 topics contain fewer than 10 high-probability  
212 ( $>0.2$ ) codes), but the model also infers dense topics, such as topics 8 and 10 which include  
213 41 and 43 high-probability codes respectively. To assess whether codes tend to be specific to  
214 a topic, we normalised their probabilities across topics to make the largest probability 1. We  
215 found that, in general, codes are typically specific to topics: most (87/100) are active  
216 (normalised probability  $>0.5$ ) in 3 or fewer topics. However, some codes are active in many  
217 topics, such as I10 (essential hypertension, active in 6 topics) and C44 (other malignant  
218 neoplasms of skin, active in 8 topics) (Figure 3a), suggesting that they have both large

219 prevalence and a large number of multimorbidity partners belonging to different disease  
220 clusters. The top disease codes (i.e. the five with the largest probabilities) in the 10 non-empty  
221 topics are consistent with known disease mechanisms (Figure 3b), and are most frequently  
222 drawn from two (6/10) of the ICD-10 chapters. Specifically, in Topic 5, codes E78 (disorders  
223 of lipoprotein metabolism and other lipidemias) and I10 (essential hypertension) are  
224 components of the metabolic syndrome<sup>54</sup>, which is associated with increased risk for  
225 cardiovascular diseases (CVD)<sup>55</sup>, an association supported by the other three inferred top  
226 codes for this topic (I20, I21 and I25, all heart diseases). Another example is Topic 11, whose  
227 top codes include four spondylopathy subtypes, while the remaining one is G55 (nerve root  
228 and plexus compressions), a common complication of intervertebral disk disorders.

229 In addition to defining topic vectors, the model also infers individuals' weights for all topics  
230 (shown for 2,000 individuals in Figure 3c, Supplementary Table 5). As expected, most  
231 individuals have substantial weight for the empty topic, and this weight was strongly and  
232 negatively associated (Pearson correlation: -0.853) with the total number of diagnoses.  
233 Individuals that were not diagnosed with any of the top-100 ICD-10 codes (629/2,000) have a  
234 weight near 1 for the empty topic, while the majority of other individuals (1056/1371) have  
235 large weight (>0.1) for less than two disease (non-empty) topic, as expected from the sparsity  
236 of the data.

237 To compare the performance of treeLFA with flatLFA and LDA, we used the same input data  
238 to train the flatLFA model with 11 topics and the LDA model with 10 topics (no empty topic  
239 would be inferred by LDA, so it was trained with one fewer topic). Topics inferred by treeLFA  
240 and flatLFA were almost identical (Supplementary Figure 2a), indicating that the input data  
241 was large enough to make the impact of the informative prior minimal. Most topics inferred by  
242 LDA also had a high level of similarity to the non-empty topics inferred by treeLFA, except for  
243 two topics, for which the cosine similarities were 0.685 and 0.853 (Supplementary Figure 2b).  
244 Overall, these results indicate that the three topic models captured the same multimorbidity  
245 pattern from the top-100 UKB dataset.

246

## 247 GWAS on topic weights

248 We next investigated whether the quantitative traits defined by the topic weights can be used  
249 to identify genetic variants that are associated with an individual's risk for developing  
250 multimorbidities represented by the topics. We performed GWAS on individuals' weights for  
251 the 11 topics inferred by treeLFA (topic-GWAS), and identified associations that reached  
252 genome-wide significance ( $p < 5 \times 10^{-8}$ ; non-lead SNPs with  $r^2 > 0.1$  were removed). For  
253 comparison, we also performed standard binary GWAS for the 100 ICD-10 codes and the 296  
254 Phecodes mapped from these ICD-10 codes (see Methods for details).

255 We found 128 independent loci associated with at least one of the 11 topics, while 812  
256 independent loci were associated with at least one of the 100 ICD-10 codes; 82 loci were  
257 shared between the sets (Figure 4a). Phecode GWAS showed similar patterns  
258 (Supplementary Figure 3a,b). Breaking this down by topic, we find that unique loci found by  
259 topic-GWAS were highly non-randomly distributed (Figure 4b, Supplementary Table 6). Most  
260 unique loci were associated with the empty topic (20/36), followed by Topic 8 (17/28) which  
261 contains a large number (41) of high probability codes (>0.2) from Chapter 11 (Diseases of  
262 the digestive system, 12 codes) and 13 (Diseases of the musculoskeletal system and

263 connective tissue, 13 codes). In contrast, four sparse topics showed no unique loci. Topics 5  
264 (metabolic and heart diseases) and 6 (joint diseases) had many associated loci (50 and 17  
265 respectively) and also a substantial number of unique loci (5 and 7 respectively), suggesting  
266 that active codes in these topics include shared genetic components. The identification of  
267 novel loci indicates that topic-GWAS provides additional power for discovery. For example,  
268 Figure 4c (Supplementary Table 7) compares P-values of lead SNPs from the topic-GWAS  
269 for Topic 5, and P-values for association of the same loci with the top five active codes in Topic  
270 5 (E78, I10, I20, I21, I25) from the single code GWAS. For most topic-associated lead SNPs,  
271 P-values given by topic-GWAS are smaller than those given by the corresponding single code  
272 GWAS, indicating increased power for these examples. This also explains some loci uniquely  
273 found by topic-GWAS, including some loci that show single-code P-values well below genome-  
274 wide significance (see Figure 4d for two example loci). Despite the limited numbers of topic-  
275 associated loci, the genomic control inflation factor and LD score regression (LDSC) indicate  
276 that most topics are in fact highly polygenic traits, with the exception of the empty topic and  
277 Topic 8, for which LDSC analysis suggests that uncontrolled confounding factors exist  
278 (Supplementary Table 8; age, sex and the first 10 PCs were controlled for in topic-GWAS).

279 We next asked whether topic-GWAS simply identify associations with disease groups  
280 (categories) represented by internal nodes of the ICD-10 or the Phecode ontology tree, which  
281 correspond to expert-led disease clusters and provide a useful contrast to our data-driven  
282 multimorbidity clusters. To answer this we performed GWAS on groups of ICD-10 codes or  
283 Phecodes corresponding to internal nodes in the respective classification systems. We found  
284 634 loci associated with the 68 internal ICD-10 codes and 296 loci associated with the 136  
285 internal Phecodes. Of the 128 topic-associated loci, 41 were not associated with any of the  
286 internal or terminal ICD-10 codes; and for Phecodes the corresponding number was 56  
287 (Supplementary Figure 3c-f). This indicates that topic modelling provides insights into the  
288 relationships of diseases beyond those provided by expert-driven disease groupings encoded  
289 in ontologies. For example, Topic-8 has the majority of its active codes coming from Chapter  
290 11 (Diseases of the digestive system) and 13 (Diseases of the musculoskeletal system and  
291 connective tissue), and a similar multimorbidity cluster was also identified by a recent study  
292 on UK Biobank <sup>11</sup>. Interestingly, this cluster has many unique loci found by topic-GWAS,  
293 possibly indicating that these two categories of diseases share some underlying biology.

294 We then compared the topic-GWAS results for topics inferred by treeLFA, flatLFA and LDA.  
295 As expected from the similarity of topics inferred by treeLFA and flatLFA, similar numbers of  
296 associated loci were identified (128 and 126; Supplementary Figure 4a), compared to LDA,  
297 which identified many fewer (65; Supplementary Figure 4b), of which 44 overlap with the  
298 treeLFA loci. This difference in numbers of associated loci is mostly due to treeLFA's empty  
299 topic (associated with 36 loci), which is not identified by LDA, and also due to differences in  
300 the dense Topic 8 (treeLFA, 28 loci; LDA, 4 loci), and topics 5 and 6 (Supplementary Figure  
301 4c). One reason for the relatively poor performance of LDA may be that LDA-derived topic  
302 weights are negatively correlated with each other, as they must sum to one, while treeLFA's  
303 topic weights are only negatively correlated with the empty topic weight, but are otherwise  
304 almost independent of each other (Supplementary Figure 5).

## 305 **Validation of topic-GWAS results**

306 To exclude the possibility that the unique topic-GWAS associations were driven largely by



307 technical biases or population stratification, we validated the results in three ways. First we  
308 considered overlap with previously identified loci reported in the GWAS catalogue<sup>56</sup>. We find  
309 that 114/128 (89.1%) of all topic-associated loci and 36/46 (78.3%) of unique associations  
310 have records in the GWAS catalogue, and this overlap is consistent across topics  
311 (Supplementary Figure 6a). Second, we looked at enrichment of topic-associated loci in  
312 functional genomic regions. To do this we defined three groups of SNPs, including lead SNPs  
313 for all loci associated with ICD-10 codes, a random selection of 10,000 GWAS tag SNPs  
314 (controls) and topic-associated lead SNPs that were not found by single code GWAS, and  
315 then compared the proportions of them that have different functional properties (two-proportion  
316 Z-test, adjusted P-value<0.05, Bonferroni correction). We find that compared to random SNPs,  
317 a significantly larger proportion of topic-associated SNPs are in genomic regions with strong  
318 transcription activity (using chromHMM-predicted chromatin states as proxy<sup>57</sup>). In addition,  
319 the proportions of SNPs that are QTLs and have chromatin interactions (CI) in at least one  
320 tissue in the first and third groups are similar (0.83 and 0.77 are eQTL, 0.90 and 0.98 have  
321 CI), and larger than the corresponding proportions in the control group (0.50 and 0.65 for eQTL  
322 and CI), indicating that loci associated with single codes and topics have comparable  
323 functional properties which are different from those for controls. (Supplementary Figure 6b-d).

324 Third, we made use of the test data to validate topic-GWAS results. We reasoned that if topics  
325 and their associated loci represent true biological processes, then topic-GWAS results should  
326 enable us to predict the risks of individual diseases with an accuracy comparable to that  
327 achieved using single code GWAS. To do this we first constructed PRS for topic weights using  
328 topic-GWAS results on training data. We found that they all show significant association with  
329 inferred topic weights on test data (Supplementary Table 9, see Methods for details). We then  
330 used these PRS for topics to construct PRS for the 100 ICD-10 codes, by adding individuals'  
331 PRS for the ten disease topics weighted by the probability of the ICD-10 code of interest in  
332 each topic. For comparison, we also constructed PRS for all ICD-10 codes directly using the  
333 single-code GWAS results in the standard way. Each pair of PRS for an ICD-10 code was  
334 used to predict individuals' corresponding diagnosed disease in the test data, and their  
335 performance was evaluated using the area under the receiver-operator curve (AUC) statistic.  
336 For 65 ICD-10 codes, topic-PRS AUCs are larger than single-code PRS AUC (Figure 4f,  
337 Supplementary Table 10), with increases ranging from 1% to 5%. This increase was seen  
338 most for ICD-10 codes from chapters 5 (Mental and behavioural disorders, 75% (3/4) showing  
339 increased AUC), 11 (Diseases of the digestive system, 86% (18/21)) and 13 (Diseases of the  
340 musculoskeletal system and connective tissue, 70% (14/20)). By contrast, single-code PRS  
341 performed well for codes that have a relatively large number of associated loci found by single  
342 code GWAS (>10 associated loci; 18/22 disease codes show larger AUC for single-code PRS  
343 than topic-PRS; Supplementary Figure 7a,b). Finally, to make an objective comparison of the  
344 topic-GWAS for treeLFA and LDA, we constructed PRS for ICD-10 codes from LDA's topic-  
345 GWAS using the same approach, and found that in the majority of cases (99/100) the PRS  
346 based on treeLFA's results have larger AUC (Supplementary Figure 7c), indicating treeLFA's  
347 topic-GWAS is more informative. Taken together, the three complementary approaches  
348 indicate that topic-GWAS associations broadly represent true genetic associations with  
349 biological phenotypes.

## 350 Inference and topic-GWAS results across models

351 Before applying treeLFA to a larger data set containing more diseases, we considered how to  
352 select the number of topics (K), a fundamental problem for topic models. We trained treeLFA  
353 models with different numbers of topics (K=2-20, 50, 100) on the top-100 data set, and found  
354 that for larger K topic vectors were frequently duplicated, therefore we performed clustering  
355 on the posterior samples of topics (see Methods for more details). The resulting topics always  
356 included an empty topic, and as K increased the topics tended to become more sparse,  
357 although some dense topics always remained (Figure 5a, Supplementary Table 11). As K  
358 increased, topics tended to split into sub-topics, which we visualised in a tree by connecting  
359 each topic to its most similar topic (measured by Pearson correlation of topic vectors) in the  
360 layer above, and we observed that the topics split in a stable way (Figure 5b, Supplementary  
361 Table 12). These observations indicate that topic-GWAS loci and associated effect sizes  
362 should also be stably identified. We verified this for many loci (examples in Supplementary  
363 Figure 8), and Figure 5b illustrates this for a single variant. On the top-100 UKB dataset, the  
364 number of distinct topics remaining after clustering is saturated at 25-30 topics  
365 (Supplementary Figure 9a). Similarly, the total number of topic-GWAS loci, the number of  
366 unique such loci, and the predictive likelihood on the test data all began to saturate beyond  
367 K=20 (Figure 5b; Supplementary Figure 9b). We do note that for models with K=50 or K=100,  
368 we infer several near-empty topics after clustering, which are unlikely to be stable  
369 multimorbidity patterns and are challenging to interpret. Taken together, these results indicate  
370 that selecting a sufficiently large value for K, combined with post-hoc clustering of topics, is a  
371 computationally efficient strategy for producing a stable and comprehensive set of topics.

## 372 Results on a larger UKB dataset

373 We next defined a larger data set consisting of the 436 ICD-10 codes from chapters 1-14 with  
374 a prevalence exceeding 0.001 in UKB (top-436 UKB dataset, Supplementary Table 13), and  
375 again randomly split this 80/20 into training and testing datasets. Training treeLFA/flatLFA  
376 models with 100 topics, we identified about 40 distinct topics after clustering of posterior  
377 samples. Therefore, we kept 40 topics for both models (for the convenience of an objective  
378 comparison of predictive likelihood), and collapsed the remaining near-empty topics into the  
379 empty topic.

380 Since the inference results (topics) given by different treeLFA/flatLFA chains were not exactly  
381 the same, we used the result given by the chain with the largest predictive likelihood on the  
382 test data for the downstream analyses. Among the 40 inferred topics, 29 were found by all  
383 three treeLFA chains, and five were found by two treeLFA chains, suggesting most topics  
384 were stably identified from the data (Figure 6a, Supplementary Table 14). The 40 topics again  
385 include several dense topics, with topics 1-5 including more than 40 active codes (having a  
386 normalised probability>0.5 in a topic). The set includes many sparse topics, with most  
387 including active codes enriched (Fisher exact test, adjusted P values<0.05, FDR corrected)  
388 for 1-2 ICD-10 chapters, and again a single empty topic (Figure 6a-b; Supplementary Table  
389 14,15). The top active codes in topics (defined as having an unnormalized probability>0.3) are  
390 shown in Table 1, where topics are annotated based on the categories of these top active  
391 codes. For most topics, their top active codes represent similar diseases, such as diseases

392 affecting the same physiological system or having the same pathological mechanism.  
393 Comparing topics identified by treeLFA and flatLFA, we found that 32 topics were identified  
394 by both models (cosine similarity>0.9; Supplementary Figure 10a), while the remaining topics  
395 have substantial differences. Overall, the predictive likelihood of treeLFA chains was better  
396 than that of flatLFA, and has a smaller range (Supplementary Figure 10b), indicating that the  
397 tree-based prior is indeed helpful in extracting meaningful patterns from the data.

398 We then performed topic-GWAS on the 40 treeLFA and flatLFA topics we kept. We found 278  
399 treeLFA and 260 flatFLA genome-wide significant loci, with the majority (207) found in both  
400 sets and associated with corresponding topics (Supplementary Figure 10c-d, Supplementary  
401 Table 16). We also performed single-code GWAS on the 436 ICD-10 codes and found 1,093  
402 associated loci, among them 198 were also associated with treeLFA topics. Lead SNPs for  
403 loci only associated with treeLFA topics (80 unique loci) had smaller effect sizes (median  
404 absolute effect size: 0.021) compared to loci supported by both topics and single codes (0.024)  
405 (Figure 6d, Supplementary Table 17), indicating that topic-GWAS enabled the discovery of  
406 variants with small effects on multiple related diseases. Unique loci were not uniformly  
407 distributed across topics; as in the top-100 dataset, many were associated with the empty  
408 topic (21). Topics 3 and 30 also have large proportions of unique loci (81.5% and 83.3%), and  
409 most of their active codes are from Chapter 13 (Diseases of the musculoskeletal system and  
410 connective tissue) (Figure 6e, Supplementary Table 18). Other topics that are associated with  
411 substantial numbers of unique loci are shown in the Supplementary Table 19.

412 We validated the topic-associated loci for the larger dataset using the same approach as used  
413 with the top-100 dataset. Overall, 89.2% (248/278) of topic-associated loci and 78.9% (63/80)  
414 of unique associations have records in the GWAS catalogue. The functional validation results  
415 were also similar to that on the top-100 dataset, with unique topic-associated loci and single  
416 code associated loci exhibiting similar profiles (Supplementary Figure 11). The two types of  
417 PRS for single codes were also constructed using single code and topic-GWAS results. For  
418 130 in 436 (30%) ICD-10 codes, PRS based on topic-GWAS resulted in larger AUC on the  
419 test data. These codes were mainly from Chapter 3 (Diseases of the blood and blood-forming  
420 organs and certain disorders involving the immune mechanism, 5/12), Chapter 9 (Diseases of  
421 the circulatory system, 21/48) and Chapter 13 (Diseases of the musculoskeletal system and  
422 connective tissue, 24/52). In contrast, for most (93 of 109) ICD-10 codes with more than 5  
423 associated loci, PRS based on single code GWAS resulted in better performance  
424 (Supplementary Table 20). To compare treeLFA and flatLFA, we also constructed PRS for  
425 single codes based on flatLFA results, and compared their AUC on the test data to that of  
426 treeLFA. For 231 in 436 codes (53%), PRS based on treeLFA showed better performance.  
427 Supplementary Figure 10e compares the density plots for the AUC of PRS for all codes given  
428 by the two methods, where treeFLA shows a minor advantage.

429

## 430 Discussion

431 Multimorbidity is a major challenge for today's healthcare systems, yet our understanding of it  
432 remains limited<sup>58</sup>. The establishment of biobanks linked to electronic health records presents  
433 an opportunity for a more systematic study of multimorbidity, and highlights the need for  
434 reliable and powerful analytic tools to enable the identification of major multimorbidity clusters  
435 and downstream analyses of paired phenotype and -omics data.

436 Here we developed treeLFA, a topic model inspired by Latent Dirichlet Allocation (LDA) that  
437 admits a prior for topics constructed on existing tree-structured medical ontologies. We  
438 compared it to flatLFA and LDA on both simulated and UKB data, and found that the prior was  
439 effective at extracting relevant topics from limited input data, such as data involving rare  
440 diseases. We also found that the novel model structure better fits the binary input data,  
441 resulting in the identification of an empty ("healthy") topic, and ensuring that topic weights for  
442 the remaining disease topics were largely uncorrelated, improving power for downstream  
443 topic-GWAS. We implemented algorithms to optimise hyperparameters of the model, and  
444 developed a computationally efficient approach to determine the number of meaningful topics  
445 to be inferred.

446 By applying treeLFA to HES data for 436 common diseases recorded in UKB, we identified 40  
447 topics reflecting combinations of diseases that tend to co-occur. These topics varied in density  
448 and include a single empty topic, many sparse topics that each include a small number of  
449 active disease codes, and several dense topics. We found that the inferred topics were largely  
450 consistent with the current disease classification system (ICD-10), yet treeLFA also combines  
451 diseases distant on the tree structure into the same topic, indicating the utility of supplementing  
452 expert-led knowledge systems with data-driven methods. By comparing the topics inferred by  
453 treeLFA and LDA, and topics inferred by different treeLFA models, we found that  
454 multimorbidity clusters were consistently inferred, indicating the existence of stable  
455 multimorbidity clusters, and that topic modelling of cross-sectional diagnosis data is an  
456 informative method of finding them.

457 Most inferred topics likely reflect underlying aetiology, as indicated by the fact that the large  
458 majority (34/40) show genome-wide significant associations with genetic markers, while 20  
459 topics are associated with 80 novel loci that do not reach genome wide significance in GWAS  
460 for single ICD-10 codes, and show evidence of functionality using multiple methods. The active  
461 ICD-10 codes in the topics with the most novel associations are mainly from Chapter 13  
462 (Diseases of the musculoskeletal system and connective tissue), with substantial contributions  
463 also from Chapters 4 (Endocrine, nutritional and metabolic diseases), 9 (Diseases of the  
464 circulatory system) and 14 (Diseases of genito-urinary system), suggesting that diseases in  
465 these chapters share genetic risk factors.

466 With topic-GWAS results, we explored constructing PRS for a single code as the sum of PRS  
467 for all topics weighted by the probabilities of the code in topics. We found that for certain codes,  
468 especially codes with very few GWAS hits from Chapter 13, this new type of PRS outperforms  
469 the standard PRS based on single code GWAS results. This improvement in prediction might  
470 result from better estimation of effect sizes of variants by topic-GWAS. This is because  
471 although treeLFA factorises the input matrix in a linear way, it achieves a dimension reduction  
472 by mapping from the disease space to the topic space. This results in fewer traits and therefore

473 more ‘cases’ for each one, which is especially beneficial for the study of the highly polygenic  
474 traits (topic weights), where there are a large number of SNPs with small effects.

475 In contrast to topic-GWAS, single-code GWAS on the 463 common diseases resulted in 1,093  
476 significant associations, of which the vast majority (895) were not associated with any topic.  
477 Taken together, these genetic analyses indicate that the majority of genetic associations are  
478 driven through links to individual diseases. Meanwhile, most multimorbidity clusters also have  
479 genetic bases, which are mainly composed of pleiotropic genetic variants affecting risks of  
480 multiple active diseases in the cluster. Besides, there are also a substantial number of  
481 associations for topics that are difficult to identify by single code GWAS due to the lack of  
482 power. From a biological perspective, they might reflect the complex connections between  
483 upstream pathways that are distant to individual diseases, or variants with direct yet small  
484 effects across multiple diseases. Overall, these observations are a helpful starting point for  
485 our pursuit of a deeper understanding of the mechanisms underlying multimorbidity clusters.

486 We consistently identified an “empty” topic, which reflects individuals’ overall disease burden,  
487 since their weights for the “empty” topic are negatively correlated with their total number of  
488 diagnosed diseases. Perhaps surprisingly we found that this topic showed many genetic  
489 associations, many of which (21/35) had not been identified before. An enrichment analysis  
490 for topic-associated genes (Methods) indicated several lifestyle-associated factors, such as  
491 gym attendance and religious observance, suggesting that this topic may be related to  
492 individuals’ health behaviour, which in part is genetically determined. In contrast, for most  
493 sparse disease topics, the enriched gene sets are usually directly related to the active codes  
494 in the topic (Supplementary Table 21).

495 There have been many studies aiming at identifying multimorbidity patterns using various  
496 methods <sup>12,13,16,17,59</sup>. Most of these studies focus on dozens of diseases that in addition varied  
497 from study to study, making comparisons difficult. We compared the topics identified by  
498 treeLFA with multimorbidity networks (which are interpretable at the level of genetic loci) found  
499 by a recent study using the HES data for 439 common diseases in UKB (433 of these are  
500 included in the top-436 UKB dataset in our study) <sup>11</sup>. For most of the disease networks, there  
501 are specific corresponding disease topics identified by treeLFA (Supplementary Table 22).  
502 However, the overlap of active codes in treeLFA inferred topics and the disease networks is  
503 limited, suggesting significant differences in the details of the inference results. This  
504 discrepancy could be caused by the fundamental differences between the two methods, since  
505 treeLFA analyses all diseases simultaneously, while multimorbidity networks were constructed  
506 based on pairs of diseases that tend to co-occur. One limitation of topic models is that they  
507 cannot determine the relationships between active diseases in the same topic. In contrast, an  
508 advantage of topic models is that they make direct use of individual level data for the genetic  
509 analyses, and allows for making predictions on the test data, which provides an objective way  
510 to compare different methods.

511 Our work represents real progress in the understanding of multimorbidity, yet also reveals  
512 important and unsolved challenges. For instance, while we showed that taken together the  
513 novel genetic associations likely represent true biology, we have not performed individual  
514 replication of the findings in this study in independent data sets and this may be challenging  
515 unless the data sources and methods of data collection are comparable to UK Biobank. The

516 problem of inferring disease topics that are stable, tractable and biologically meaningful across  
517 geographies and healthcare systems represents a major challenge for future research.

## 518 Acknowledgements

519 This work uses data provided by patients and collected by the NHS as part of their care and  
520 Support. Funded by the Chinese Academy of Medical Sciences (CAMS) China Oxford  
521 Institute (COI) and Studentship from the China Scholarship Council (CSC) (YZ).  
522 Computation used the Oxford Biomedical Research Computing (BMRC) facility, a joint  
523 development between the Wellcome Centre for Human Genetics and the Big Data Institute  
524 supported by Health Data Research UK and the NIHR Oxford Biomedical Research Centre.  
525 We thank Chris Holmes for the discussion.

## 526 Author Contributions

527 Y.Z.: conceptualization, data curation, formal analysis, methodology, software, validation,  
528 visualisation, writing-original draft; X.J.: conceptualization, data curation, methodology,  
529 software, writing: review&editing; A.J.M: conceptualization, project administration,  
530 supervision, writing: review&editing; G.L: conceptualization, investigation, methodology,  
531 project administration, resources, supervision, writing-original draft, writing: review&editing;  
532 GM: conceptualization, funding acquisition, methodology, project administration, resources,  
533 supervision, writing: review&editing;

## 534 Declaration of Interests

535 G.M. is a director of and shareholder in Genomics PLC, and a partner in Peptide Groove LLP.  
536 G.L. is a shareholder in Genomics PLC. The other authors declare no competing financial  
537 interests.  
538

## 539 Figures

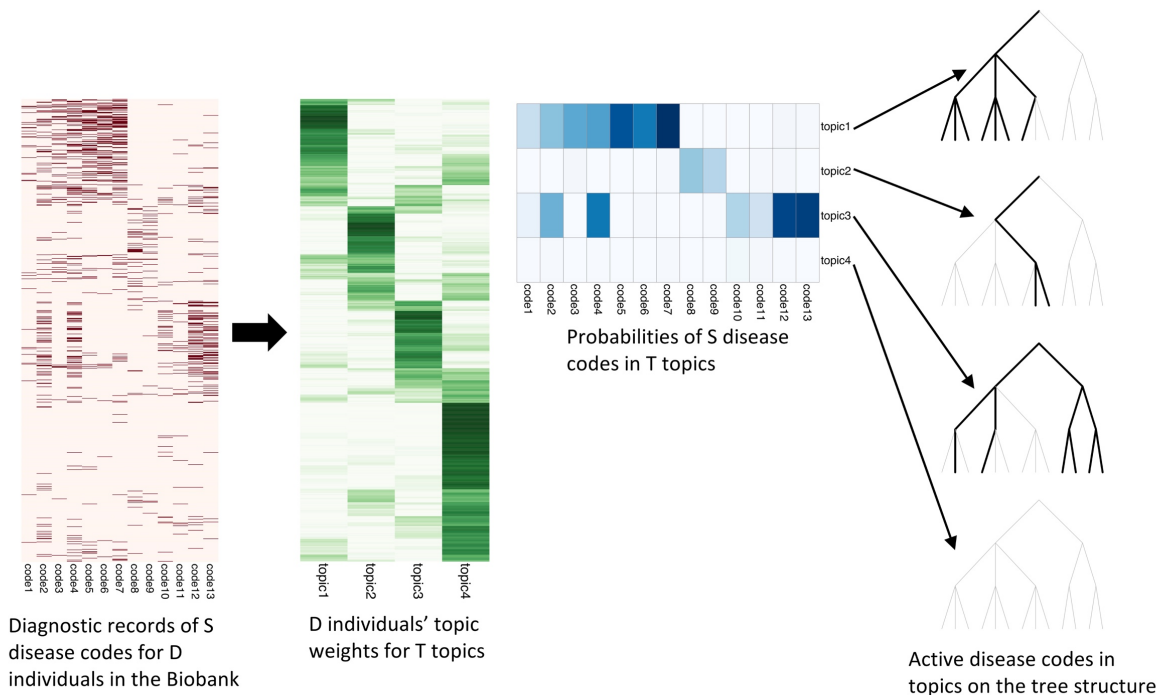

540

### 541 **Figure 1 Schematic for topic modelling of the diagnosis data in UKB with treeLFA.**

542 The presence and absence of S disease codes for D individuals in the biobank is modelled  
 543 with  $D \times S$  Bernoulli distributions. The matrix of Bernoulli probabilities is factored into the  
 544 product of a topic matrix and a topic weight matrix. Individuals' weights for topics are  
 545 modelled with categorical distributions with a Dirichlet prior. Each topic is composed of S  
 546 probability variables with Beta priors to parameterize the Bernoulli distributions for disease  
 547 codes. Disease codes can be either active or inactive in topics. Active disease codes have  
 548 large probability while inactive ones have near zero probability. A prior for topics (specifies  
 549 the likelihood of different disease codes to be active in topics) is constructed on the tree  
 550 structure of disease codes specified by a medical ontology (such as the ICD-10 coding  
 551 system). The path from the root node to active leaf nodes (corresponding to all active  
 552 disease codes in a topic) are highlighted on a three-layered tree structure for 13 disease  
 553 codes in 4 topics.

554

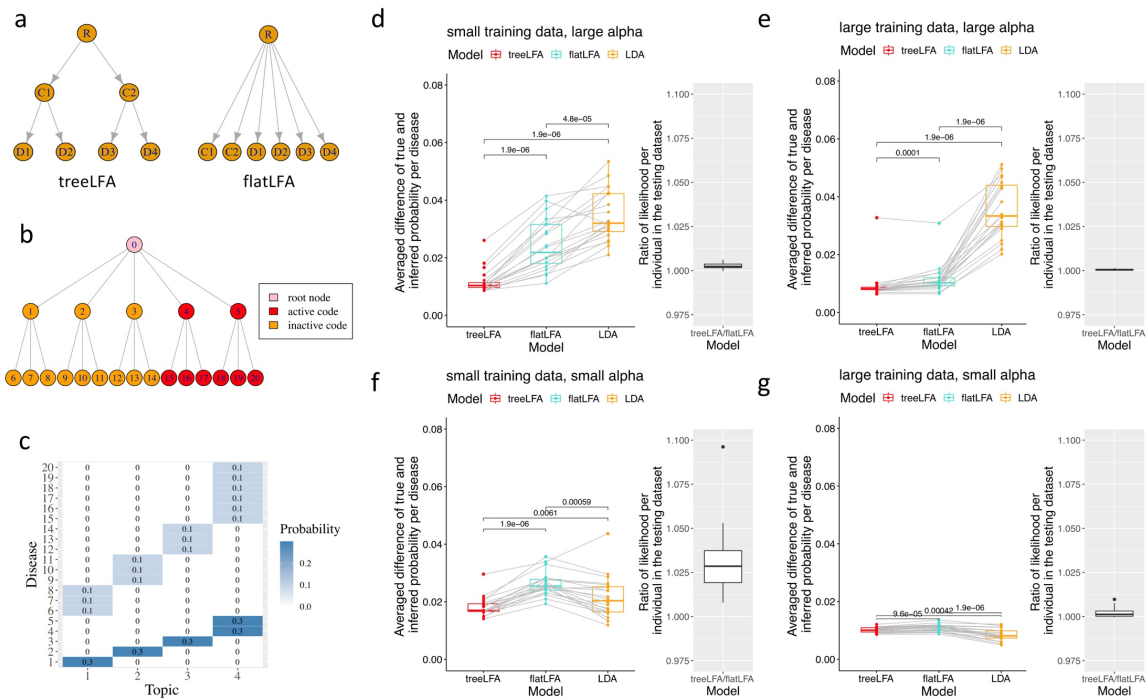

555  
556 **Figure 2 Comparison of three related topic models (treeLFA, flatLFA and LDA) on**  
557 **simulated datasets.**

558 a, The informative and non-informative tree structures used by treeLFA and flatLFA.  
559 b, The tree structure of the 20 disease codes used for simulation. Red nodes on the tree correspond to  
560 all active disease codes in Topic 4 used for simulation (in Figure 2c).  
561 c, The four topics used for simulation. The heatmap shows the probabilities of diseases in topics. Each  
562 row corresponds to a disease code, each column corresponds to a topic. Inactive disease codes in  
563 topics have zero probability. All active disease codes in each of the first three topics come from the  
564 same branch of the tree in Figure 2b. Active codes in the last topic come from the last two branches of  
565 the tree in Figure 2b.  
566 d-g, Comparison of three topic models on simulated datasets. The performance of three topic models  
567 (treeLFA, flatLFA and LDA) on four groups of simulated datasets are shown. The four groups of datasets  
568 were generated using the same topics (Figure 2c), and different values for D (number of individuals in  
569 the training dataset) and  $\alpha$  (the concentration parameter of the Dirichlet prior for individuals' topic  
570 weights). For each combination of D and  $\alpha$ , 20 datasets (including both training and testing datasets)  
571 were simulated. Inference accuracy of topic models is evaluated using the averaged per disease  
572 difference between true and inferred probability of all diseases in all 4 topics (box plots). Each dot in a  
573 box plot is the result of one model on one dataset, and dots for different models on the same dataset  
574 are connected with grey lines. For treeLFA and flatLFA, the predictive likelihood on the testing datasets  
575 were calculated using topics inferred on the training data. Each dot in the point plot represents the  
576 treeLFA to flatLFA ratio of per individual averaged predictive likelihood for one dataset. d, Results on  
577 datasets simulated using D=2500 and  $\alpha=1$ . e, Results on datasets simulated using D=5000 and  $\alpha=1$ . f,  
578 Results on datasets simulated using D=300 and  $\alpha=0.1$ . g, Results on datasets simulated using D=1000  
579 and  $\alpha=0.1$ .  
580



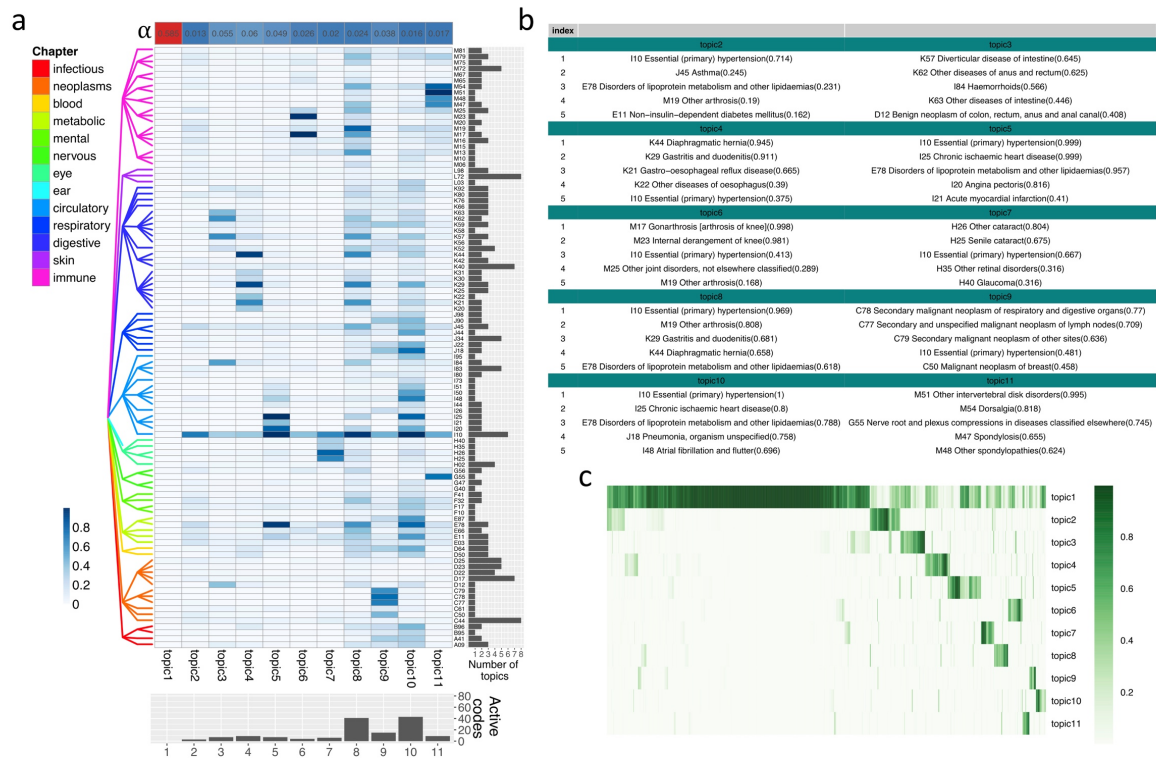

581  
582  
583  
584  
585  
586  
587  
588  
589  
590  
591  
592  
593  
594  
595

**Figure 3 Inference results given by treeLFA on the top 100 UKB dataset.**

a, 11 topics inferred by treeLFA from the top-100 UKB dataset. The heatmap shows the probabilities of 100 ICD-10 codes in the 11 treeLFA topics, in which each row is an ICD-10 code and each column is a topic. Topics are arranged in a descending order of their corresponding entries in the optimised  $\alpha$  vector (the single-row heatmap on the top). The tree structure for the 100 ICD-10 codes is shown to the left of the heatmap. Codes from different chapters of the ICD-10 coding system are colored differently. The barplot below the heatmap shows the numbers of ICD-10 codes with a probability of at least 0.2 in topics. The barplot on the right side of the heatmap shows the number of topics in which an ICD-10 code is active (with a normalised probability of at least 0.5).

b, The top 5 codes with the largest probability in the 10 non-empty treeLFA topics (topics 2-11 Figure 3a). Numbers in the brackets show the probabilities of disease codes in topics.

c, Inferred weights for the 11 topics for 2000 random individuals. Each row in the heatmap is a topic, and each column is an individual.

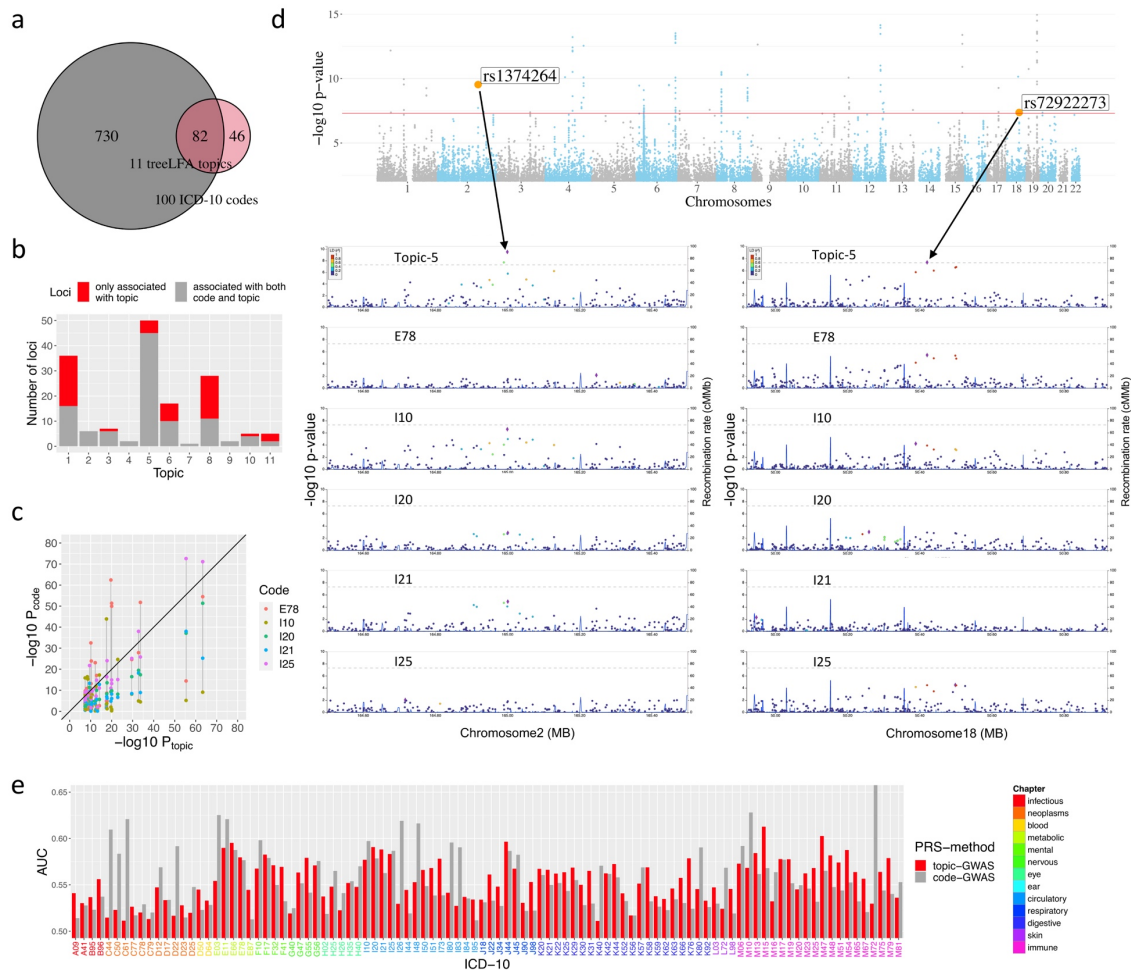

596

597 **Figure 4 topic-GWAS result for the 11 topics inferred by treeLFA.**

598 a, The total numbers of significant loci found by topic-GWAS for the 11 treeLFA topics and single code

599 GWAS for the 100 ICD-10 codes, and the overlap of these two sets of loci.

600 b, The numbers of significant loci found by both single code/topic-GWAS, and the numbers of loci only

601 found by topic-GWAS for the 11 treeLFA topics.

602 c, Comparison of P-values given by topic-GWAS for all lead SNPs for Topic 5 and P-values for the

603 same SNPs given by single code GWAS for the top 5 active codes (E78, I10, I20, I21, I25) in Topic 5.

604 d, The Manhattan plot for Topic 5, and the regional Manhattan plots for single code/topic-GWAS results

605 for two example lead SNPs of Topic 5.

606 e, Comparison of two types of PRS for the 100 ICD-10 codes. One type of PRS is directly constructed

607 using the single code GWAS results. Another type of PRS for ICD-10 codes is constructed as the sum

608 of PRS for topics weighted by the probabilities of an ICD-10 code in all topics. The AUC of these two

609 types of PRS on the test dataset are plotted.

610

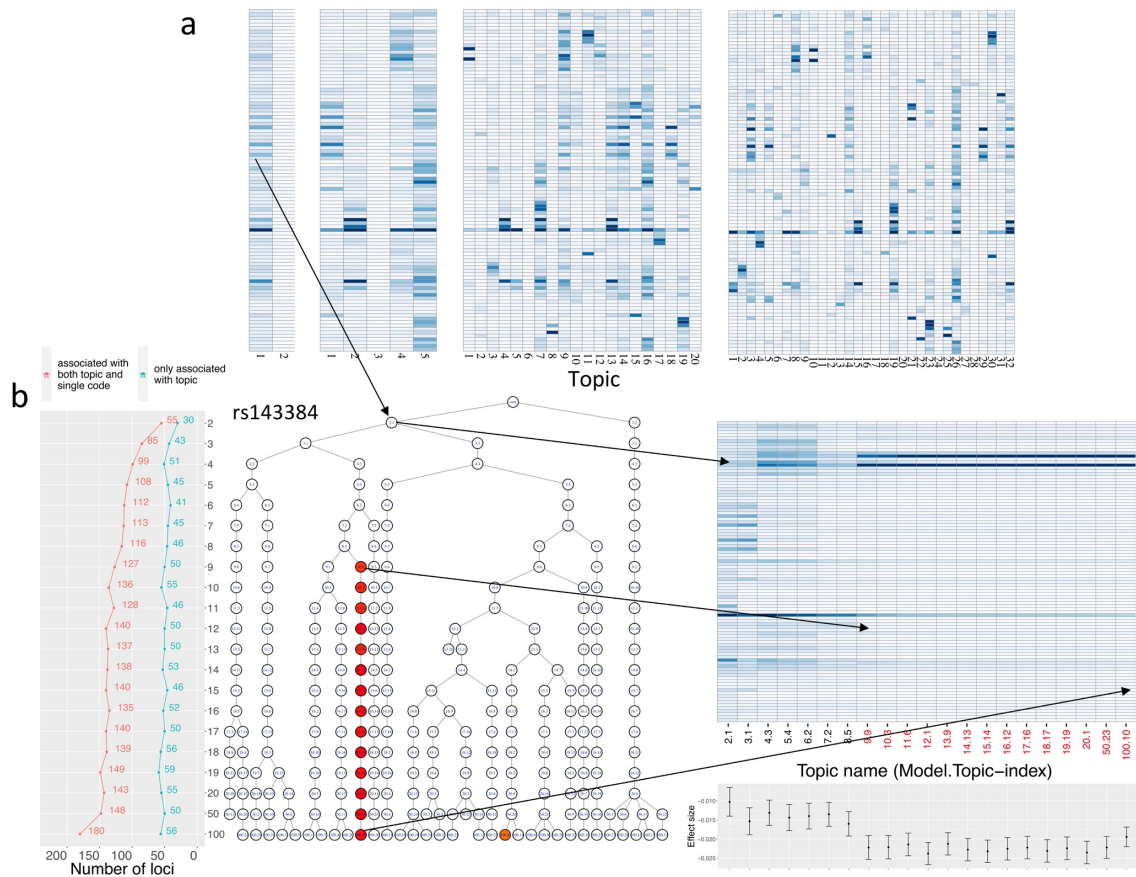

611  
612  
613  
614  
615  
616  
617  
618  
619  
620  
621  
622  
623  
624  
625  
626  
627  
628  
629  
630

**Figure 5 Inference and topic-GWAS results across treeLFA models set with different numbers of topics.**

a, Averaged inferred topics given by the treeLFA models set with 2, 5, 20 and 100 topics. For each treeLFA model, ten Gibbs chains were trained, and 50 posterior samples of topics were collected from each chain. Posterior samples of topics from different chains are mixed and clustered, and the mean topic vectors are then calculated for each cluster.

b, Relationship of topics inferred by different models. All topics inferred by all treeLFA models are organised into a tree structure. Each node on the tree is a topic inferred by a model, and all nodes on the same layer (level) of the tree are all topics inferred by the same treeLFA model (set with a certain number of topics). Each topic in the tree is connected to its most similar topic (measured with the Pearson correlation) in the layer above. Topics associated with the SNP rs143384 are colored according to the  $-\log_{10}(P\text{-value})$  for the SNP in the corresponding linear regression. Most of the associated topics are in the same branch of the tree, so all topics in this branch are plotted in the heatmap on the right side of the tree, with names of topics (model.topic-index) associated with rs143384 highlighted in red. In the barplot below the heatmap, effect sizes and standard errors of rs143384 given by topic-GWAS for the above topics are plotted. The line plot to the left of the tree shows the total numbers of topic-associated loci and the numbers of topic-associated loci that are not found by single code GWAS for different treeLFA models.

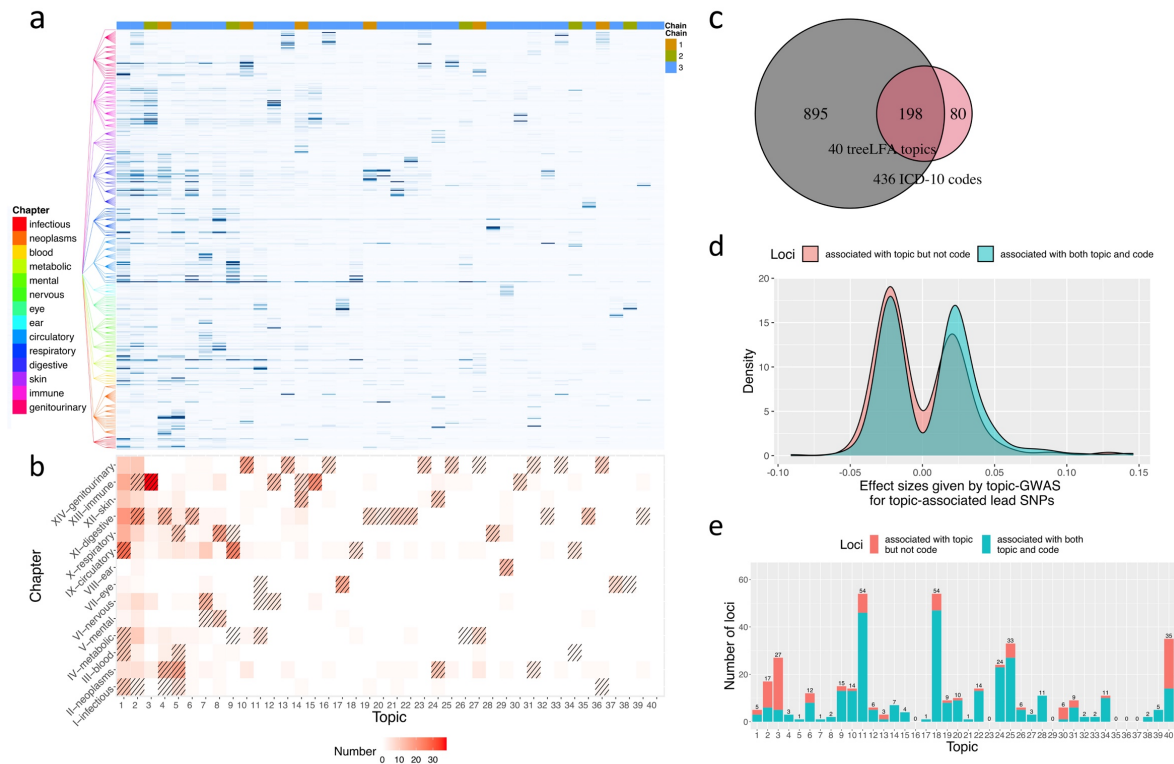

631  
632  
633  
634  
635  
636  
637  
638  
639  
640  
641  
642  
643  
644  
645  
646  
647

**Figure 6 Inference and topic-GWAS results for the 40 topics inferred by treeLFA from the top-436 UKB dataset.**

a, The 40 topics inferred by the treeLFA model set with 100 topics. Topics are ordered according to their density (the sum of the probability of all codes in the topic). The tree structure of the 436 ICD-10 codes is plotted to the left of the heatmap. The colour bar on top shows for each topic the number of treeLFA chains which inferred it.

b, The numbers of active codes (with a normalised probability of at least 0.5) in different topics coming from different ICD-10 chapters. Enriched chapters among active codes in topics are highlighted with shades in the cells (Fisher exact test, FDR<0.05).

c, The total numbers of loci associated with the 40 treeLFA topics and the 436 ICD-10 codes, and the overlap of these two sets of loci.

d, Distribution of effect sizes given by topic-GWAS for lead SNPs associated with only topic and lead SNPs associated with both topic and single code.

e, The total numbers of loci associated with different topics (in the same order as topics in Figure 6a), and the numbers of topic-associated loci that are not found by single code GWAS (red).

## 648 Tables

### 649 **Table 1 Names and top active codes of the 40 topics inferred by treeLFA on the** 650 **top-436 UKB dataset.**

651 Top ICD-10 codes (with an unnormalized probability of at least 0.3) in the 40 topics inferred by treeLFA  
652 on the top-436 UKB dataset are shown. Topics are named using the ICD-10 chapters which make major  
653 contributions to their top active codes (different chapters are connected with “-” in the names). Words  
654 after colons in the names of topics give further summary of the top active codes from a specific chapter.  
655 Topic 1 and 2 are not named since they are very dense, and there is no obvious pattern in their top  
656 active codes.

| Topic | Name                                 | Top active codes                                                                                        |
|-------|--------------------------------------|---------------------------------------------------------------------------------------------------------|
| 1     | -                                    | -                                                                                                       |
| 2     | -                                    | -                                                                                                       |
| 3     | <b>Musculoskeletal:joint-1</b>       | M19,I10,M17,M25,M13,M54,K21,E78,M47,M23,K44,E66,M15,M79,J45,K29,M16,M75,K57,G56,F32,E11,M51,M65         |
| 4     | <b>Neoplasm-Digestive</b>            | C78,C18,C77,I10,K56,D64,K63,C79,K59,K57,K66,C20,J90,K91,N39,K62,J18,K52,E87,N17,D12,B96,K43,K29,E86,A41 |
| 5     | <b>Neoplasm-Respiratory-Blood</b>    | C79,C78,D70,C77,J18,A41,J90,C34,I10,D64,J22,K59,C50,E87,N17,N39,A09,C80,J98,K52                         |
| 6     | <b>Digestive-Circulatory</b>         | I10,I25,E78,K29,I20,K44,K57,K21,E11,K62,K63,I84,D12,K22,D50,J45,D64,K20,K92,J44,K31,I48                 |
| 7     | <b>Nervous:cerebrovascular</b>       | I10,I63,E78,G81,I67,N39,I69,G40,F32,I48,J18,K59,E87,H53,B96,G45,J22,G93                                 |
| 8     | <b>Respiratory-Mental</b>            | J44,J18,F17,F32,J45,I10,F10,J22,F41,J43,J98,J47,J96,E87                                                 |
| 9     | <b>Circulatory:heart-Metabolic-1</b> | I10,I25,I48,I50,E78,I51,I20,I44,I34,I21,I08,I47,I35,J90,J18,I49,I42,E11                                 |
| 10    | <b>Urinary:male-1</b>                | I10,N32,N40,N39,E78,C67,N30,N35,N13,E11,N20,C61,K57                                                     |
| 11    | <b>Metabolic:diabetes-Eye</b>        | E11,I10,E78,E10,H26,H36,E14,I25,H25,E66                                                                 |
| 12    | <b>Musculoskeletal:spine</b>         | M51,M54,G55,M47,M48,I10,M79,M43,M50                                                                     |
| 13    | <b>Reproductive:female-1</b>         | D25,N83,N92,N80,N73,N94                                                                                 |
| 14    | <b>Skin:infection</b>                | L03,I10,L40,B95,L02                                                                                     |

|    |                                      |                                 |
|----|--------------------------------------|---------------------------------|
| 15 | <b>Musculoskeletal:joint-2</b>       | M19,M20,M25,I10,M75,M16         |
| 16 | <b>Reproductive:female-2</b>         | N95,N84,N85,I10,D25,N81         |
| 17 | <b>Eye-1</b>                         | H26,H25,I10,H35,H40,H33,H52     |
| 18 | <b>Circulatory:heart-Metabolic-2</b> | I25,I10,E78,I20,I21             |
| 19 | <b>Digestive:lower GI-1</b>          | K52,K51,K62,K63,K50,K57,I84,A09 |
| 20 | <b>Digestive:lower GI-2</b>          | K57,D12,K63,K62,I84,I10         |
| 21 | <b>Digestive:upper GI</b>            | K44,K29,K21,K22,K20,K31,I10     |
| 22 | <b>Digestive:hepatobiliary</b>       | K80,I10,K81,K82,K85             |
| 23 | <b>Urinary:female</b>                | N39,N81,N32                     |
| 24 | <b>Neoplasm:skin-Skin</b>            | C44,D22,L57,L98,L82,I10,C43     |
| 25 | <b>Urinary:male-2</b>                | N40,N32,I10,C61,K40             |
| 26 | <b>Metabolic</b>                     | I10,E78,I48,E11                 |
| 27 | <b>Renal:kidney</b>                  | N20,I10,N23,N13                 |
| 28 | <b>Respiratory:upper</b>             | J34,J33,J32,J45                 |
| 29 | <b>Ear:hearing</b>                   | H72,H91,H90,H65,I10             |
| 30 | <b>Musculoskeletal:knee</b>          | M23,M17,I10                     |
| 31 | <b>Neoplasm:breast</b>               | C50,C77,D05                     |
| 32 | <b>Digestive:lower GI-3</b>          | I84,K62,K57                     |
| 33 | <b>Reproductive:female-4</b>         | N92,D25,N84                     |

|    |                                        |                 |
|----|----------------------------------------|-----------------|
| 34 | <b>Circulatory:peripheral vascular</b> | I80,M79,I83,I26 |
| 35 | <b>Digestive:teeth</b>                 | K02,K08,K01,K04 |
| 36 | <b>Reproductive:female-5</b>           | N87,N84,N95     |
| 37 | <b>Eye:appendicle</b>                  | H02,H04         |
| 38 | <b>Eye-2</b>                           | H26,H33         |
| 39 | <b>Digestive:hernia</b>                | K40             |
| 40 | <b>Healthy</b>                         | Empty           |

657

## 658 **Methods**

659 Full technical details for treeLFA are given in the analytical note in the supplemental data.

### 660 **Validation of treeLFA with simulated data**

661 The simulation study served two purposes. Firstly, we aimed to verify that treeLFA can  
662 accurately infer latent topics from the diagnosis data encoded as binary variables. Secondly,  
663 we aimed to compare the performance of the three topic models (treeLFA, flatLFA and LDA)  
664 discussed in the next section, such that the influence of model structure and treeLFA's  
665 informative prior for topics on the inference can be assessed.

### 666 **Overview of the three related topic models**

#### 667 1. treeLFA

668 treeLFA ("latent factor allocation with a tree structured prior for topics") is a topic model  
669 designed for binary diagnosis data in biobanks based on the Bayesian mean-parameterized  
670 binary non-negative matrix factorization<sup>41</sup>. It models the presence and absence of S disease  
671 codes for D individuals with  $D \times S$  Bernoulli distributions, and the matrix of Bernoulli probability  
672 for all disease variables is factored into the topic matrix ( $\phi$ ) and the topic weight matrix ( $\theta$ ).  
673 The loading of disease code s in topic t ( $\phi_{ts}$ ) is its corresponding Bernoulli probability in the  
674 topic, and the Bernoulli probability of the disease variable for individual d and disease code s  
675 is a mixture of the Bernoulli probability of code s in all topics, with the mixing coefficients  
676 specified by the topic weights for individual d. treeLFA also incorporates an informative prior  
677 for topics constructed by running a Markov process on a tree structure of individual words,  
678 which assumes that disease codes on the same subtree are likely to have similar Bernoulli  
679 probability in the same topics (see the details in the analytic note).

#### 680 2. flatLFA

681 flatLFA has the same model space as treeLFA, with the only difference being that flatLFA  
682 uses a non-informative prior for topics, which is constructed on a tree structure where all  
683 nodes (representing all disease codes in a topic) are placed directly under the common root  
684 node. By comparing the performance treeLFA and flatLFA, the contribution of treeLFA's  
685 informative prior for topics to the inference can be assessed.

#### 686 3. LDA

687 Latent Dirichlet Allocation (LDA<sup>60</sup>)'s model configuration is different from treeLFA. LDA only  
688 models the disease codes that are diagnosed for individuals with categorical distributions.  
689 For LDA, each topic is a categorical distribution (or a Multinomial distribution if the input data  
690 is viewed as a count matrix) across the S disease codes, and a Dirichlet prior distribution is  
691 used to generate these topics. By contrast, for treeLFA each topic is a sequence of Bernoulli  
692 probability for the S disease codes, and S Beta distributions are used to generate the topics.

### 693 **Description of simulated data**

694 We simulate multiple data sets using different topics and hyperparameters to assess the  
695 performance of the three topic models (treeLFA, flatLFA and LDA) in different situations. We



696 simulate the input data sets in two steps. Firstly, we build a tree structure for 20 disease  
697 codes (Figure 2B). The tree structure has three layers. The first layer is the root node; the  
698 second layer contains five nodes, and each of them has three children nodes in the third  
699 layer. Secondly, we generate topics of disease codes using the tree structure above. A  
700 Markov process on the tree structure is used to do this (see the analytic note), and the  
701 rationale for choosing the parameter of the Markov process is explained below.

702 The Markov process chooses active disease codes (disease codes having large probability  
703 in a topic) for each topic by generating binary indicator variables for disease codes (with 1  
704 represents active codes, and 0 represent inactive codes in a topic) (see the analytic note).  
705 The Markov process has two transition probabilities,  $\rho_{01}$  and  $\rho_{11}$ , which control the sparsity of  
706 topics ( $\rho_{01} = P(I = 1 | I^{\text{parent}} = 0)$ ,  $\rho_{11} = P(I = 1 | I^{\text{parent}} = 1)$ ). Small values for both  $\rho_{01}$  and  $\rho_{11}$  give  
707 rise to sparse topics (because most codes in a topic will be inactive), while large values for  
708 both generate dense topics.  $\rho_{11}$  also controls the clustering of active codes in topics. With a  
709 large  $\rho_{11}$ , most children codes of an active parent code will be active. As a result, active codes  
710 in a topic will gather on the same branch of the tree. By contrast, if  $\rho_{11}$  is small, active codes  
711 will spread across the entire tree. For our simulation, we use topics resembling those  
712 generated with small  $\rho_{01}$  and large  $\rho_{11}$ . This reflects our belief that in the real world most topics  
713 of disease codes should be sparse (thus we chose small  $\rho_{01}$ ), and that active disease codes  
714 in the same topic tend to come from the same subtree (thus we chose large  $\rho_{11}$ ).

715 For our simulation, we construct two sets of topics manually. The first set of topics are likely  
716 to be generated using a Markov process with small  $\rho_{01}$  and large  $\rho_{11}$  (hyperparameter setting  
717 used for inference on the simulated dataset), while the second set of topics are unlikely to be  
718 generated by this Markov process. The first set of topics are used to test if the tree structure  
719 of codes improves inference accuracy, and the second set of topics are to test the robustness  
720 of treeLFA's inference when the tree structure of codes is wrongly specified. We manually  
721 specified the topics to ensure that they are completely distinct from each other and have  
722 strong patterns with respect to the clustering of active codes.

723 Figure 2B shows the first set of topics. For the first three topics, all codes on one branch of  
724 the tree are active, and the remaining codes are inactive. In the last topic, all codes from two  
725 branches of the tree are active. These topics are likely to be generated using a Markov  
726 process with small  $\rho_{01}$  and large  $\rho_{11}$ , since a parent code and all its children codes are always  
727 in the same state (either active or inactive). In the second simulation setting, active diseases  
728 in topics are not generated according to their adjacency on the tree (Supplementary Figure  
729 1B). We construct these topics by switching a fraction of active codes between topics in the  
730 first simulation setting. As a result, active parent codes always have inactive children codes,  
731 and inactive parent codes always have active children codes.

732 We simulate disease data using the topics described above and the generative process of  
733 treeLFA. For each dataset, we split the data into training and testing data of the same size.  
734 To evaluate the topic models in different situations in each topic setting, we use four  
735 combinations of two hyperparameters to simulate data:  $\alpha$  (the concentration parameter of the  
736 Dirichlet prior for topic weights  $\theta$ ) and  $D$  (the number of individuals in the training dataset). A  
737 large value for  $\alpha$  means that most individuals will have large topic weights spread across  
738 topics. By contrast, a small value for  $\alpha$  will make topic weights for each individual more

739 concentrated on a single topic. A large  $\alpha$  makes the inference difficult, since most individuals  
740 are a mixture of multiple topics. Therefore, data sets simulated using large  $\alpha$  require larger  $D$   
741 for accurate inference. For each hyperparameter and topic setting, we simulate 20 datasets.  
742 Supplementary Table 1 summarises the hyperparameter and topic settings.

## 743 Implementation of the inference procedure

744 LDA is implemented using the R package “topicmodels”, and collapsed Gibbs sampling is  
745 used to do the inference. treeLFA and flatLFA are implemented from scratch by us using the  
746 R package “RcppParallel” and “Rcpp”.

747 For the hyperparameters of treeLFA and flatLFA, we provide the true value of  $\alpha$  to train the  
748 three models. Beta priors for the probability of active and inactive disease codes in topics ( $\phi$ )  
749 are Beta(2,4) and Beta(0.3,80). Beta priors for the transition probability ( $\rho_{01}$  and  $\rho_{11}$ ) of the  
750 Markov process are Beta(4.8,20) and Beta(20,4.8) (treeLFA). For flatLFA only  $\rho_{01}$  will be used  
751 on the tree, and its prior is Beta(7,20), resulting in approximately the same expected number  
752 of active codes in topics as treeLFA. For LDA we try a few different values (0.01,0.1,1) for  $\eta$ ,  
753 the concentration parameter of the Dirichlet prior for topics. We find that with  $\eta = 0.01$  LDA  
754 has the best performance evaluated by the inference accuracy.

755 For the initialization of hidden variables for treeLFA and flatLFA, we initialised all indicator  
756 variables ( $l$ ) as 0, and then simulate all probability variables ( $\phi$ ) using the Beta prior for  
757 inactive disease codes. Topic assignment variables ( $Z$ ) are randomly sampled for all  
758 individuals.

759 For each simulation scenario, ten Gibbs chains were sampled, and 20 posterior samples of  
760 hidden variables were collected from each Gibbs chain with an interval of 100 iterations after  
761 15,000 burn-in iterations.

## 762 Evaluation and comparison of topic models on simulated datasets

763 Two metrics are used to evaluate the models in simulations. The first metric is the inference  
764 accuracy, measured with the averaged per disease difference between true and inferred

765 topic loadings:  $\Delta\phi = \frac{\sum_{k=1}^K \sum_{s=1}^S |\phi_{ks}^{\text{true}} - \phi_{ks}^{\text{infer}}|}{K \times S}$ , where  $\phi_{ks}$  is the Bernoulli probability of disease

766 code  $s$  in topic  $k$ . To reorder the inferred topics as the true topics, we match each inferred  
767 topic to the true topic that has the highest cosine similarity, in a greedy procedure (i.e. once  
768 a true topic is matched, it is removed from the matching of the next inferred topic). The  
769 pairwise t-test is used to test for statistical difference between two different models. The  
770 second metric is the predictive likelihood on the test data (see the analytic note for more  
771 details). For each posterior sample of topics, 200 Monte-carlo samples of topic weight  $\theta$  are  
772 used to approximate the predictive likelihood. A sensitivity analysis is done to ensure the  
773 number of samples for  $\theta$  is enough to have a stable estimate of the predictive likelihood.

## 774 Inference on the top-100 UK Biobank dataset

### 775 The input data for treeLFA

776 The input to treeLFA includes the diagnosis data for individuals in the UK Biobank, and the  
777 tree structure for disease codes. The diagnosis dataset is constructed from the Hospital  
778 Episode Statistics (HES) data in the UK Biobank, which is coded using the five-layered  
779 hierarchical ICD-10 billing system. The first layer of the ICD-10 tree structure is the root node;  
780 the second layer is composed of chapters of diseases coded using capital English letters; the  
781 third layer contains blocks of disease categories; the fourth layer contains single disease  
782 categories; and lastly, the bottom layer contains sub-categories of diseases, which can be,  
783 for instance, the same disease occurring at different sites of human body, or subtypes of the  
784 same disease. In UK Biobank, most of the diagnosed diseases are encoded using codes on  
785 the bottom layer (fifth layer) of the tree. We use the fourth layer of encoding as diagnoses,  
786 where we replace all diagnoses with their parental code in the fourth layer.

787 The top 100 most frequent ICD-10 codes in UK Biobank from the first 13 chapters of the ICD-  
788 10 coding system are chosen to construct the dataset. This selection of chapters provides a  
789 balance between breadth of phenotype and depth within any one chapter so that the potential  
790 benefits of treeLFA can be explored. The diagnosis data is a binary matrix, with each row  
791 represents an individual, and each column a disease code. Zeros and ones in the matrix are  
792 used to represent the absence and presence of diagnosed ICD-10 codes for individuals. If  
793 an individual is diagnosed with the same disease code several times, we keep only one  
794 record to avoid bias of repeated diagnoses. The full dataset is randomly split into a training  
795 dataset and a testing dataset, containing the diagnosis record for 80% and 20% individuals.

796 The tree structure of disease codes is encoded in a table with 2 columns: the first column  
797 contains all the ICD-10 codes on the tree, and the second column records the parent codes  
798 of the corresponding codes in the first column (Supplementary Table 3).

### 799 Implementation of treeLFA

#### 800 Training strategy for treeLFA

801 The Gibbs-EM algorithm is firstly used to optimise  $\alpha$  in two stages. In the first stage we run  
802 2,000 iterations of the Gibbs-EM algorithm. In the E-step of each iteration, we run the Gibbs  
803 sampler for treeLFA for 20 iterations and collect one posterior sample of  $Z$  (19 burn-in Gibbs  
804 sampling iterations before the collection of the posterior sample). In the M-step,  $\alpha$  is optimised  
805 using this single posterior sample of  $Z$  collected in the E-step. In the second stage we continue  
806 to run the Gibbs-EM algorithm for 200 iterations. In the E-step of each iteration, we run the  
807 Gibbs sampler for treeLFA for 200 iterations and collect ten posterior samples of  $Z$  in total (19  
808 burn-in Gibbs sampling iterations before the collection of each posterior sample). The reason  
809 to have two stages of training is to balance the computational speed with the inference  
810 accuracy. In the first stage, we optimise  $\alpha$  more frequently and quickly get close to its optimal  
811 value. In the second stage,  $\alpha$  is more accurately optimised based on multiple posterior  
812 samples of  $Z$ .

813 After optimising  $\alpha$ , we use collapsed Gibbs sampler to simulate posterior distributions of all  
814 hidden variables ( $Z, I, \phi, \rho$ ), with  $\alpha$  fixed at and hidden variables initialised at the values  
815 provided by the last iteration of the Gibbs-EM algorithm. 5,000 burn-in iterations are run before  
816 the collection of posterior samples of hidden variables. For each topic model, ten Gibbs chains  
817 are constructed, and 50 posterior samples are collected with an interval of 100 iterations from  
818 each chain.

### 819 **Choices of hyperparameters and initialization of hidden variables**

820 To shorten the training with the Gibbs-EM algorithm, we initialise  $\alpha$  as  $(1, 0.1, \dots, 0.1)$ . The first  
821 entry in  $\alpha$  is much larger than the others, and it corresponds to the empty topic that will always  
822 be inferred from real-world diagnosis data. We also initialise  $\alpha$  in other ways, such as using  
823  $(1, \dots, 1)$ , and we find that model converge to the same results regardless of the ways of  
824 initialization of  $\alpha$ , and the optimised  $\alpha$  is usually more close to  $(1, 0.1, \dots, 0.1)$  than other  
825 choices. For topic assignment variable  $Z$ , we assign the empty topic (topic 1, corresponds to  
826 the first entry in  $\alpha$ ) to all disease variables for individuals without any diagnosed disease  
827 codes. For individuals with at least one diagnosed disease code, all topics are randomly  
828 assigned to all disease variables. For topics, all indicator variable  $I$  are initialised as 0, and  
829 probability variable  $\phi$  are randomly sampled from  $\text{Beta}(1, 5,000,000)$ .  $\text{Beta}(0.3, 80)$  and  
830  $\text{Beta}(2, 4)$  are used as the prior for  $\phi$  of inactive and active codes.  $\text{Beta}(3, 20)$  and  $\text{Beta}(3, 3)$   
831 are used as the prior for transition probability  $\rho_{01}$  and  $\rho_{11}$  of the Markov process on the tree.  
832 The hyperparameters for flatLFA are set in the same way as treeLFA. For LDA, the  
833 concentration parameters of the Dirichlet priors for topic weights ( $\alpha$ ) and topics ( $\eta$ ) are both  
834 initialised as a vector of 0.1.  $\alpha$  is not optimised since we find that this has negligible influence  
835 on the inference result (inferred topics) and downstream analyses (topic-GWAS).

## 836 **Post-processing of inference result**

### 837 **Approximation of topic weights**

838 The topic weight variable  $\theta$  is integrated out during the collapsed Gibbs sampling, therefore  
839 their posterior samples need to be approximated using posterior samples of  $Z$  and  $\alpha$ .  $\theta$  can  
840 be computed as in Griffiths and Steyvers<sup>53</sup>:  $\theta_{dt} = \frac{N_{dt} + \alpha_t}{N_d + \sum_{k=1}^K \alpha_k}$ , where  $N_{dt}$  is the total number of  
841 disease variables assigned with topic  $t$  for individual  $d$ , and  $N_d$  is the total number of disease  
842 variables.

### 843 **Combining inference results from different Gibbs chains**

844 To combine the inference results given by different Gibbs chains, the “identifiability” issue  
845 needs to be addressed, since the order of topics in different posterior samples from different  
846 chains may not be the same.

847 We combine all posterior samples of topics from all chains together, and cluster topics before  
848 taking the average within each cluster. To cluster topics from all samples, we firstly construct  
849 a shared nearest neighbour (SNN) graph using the R package “scran”<sup>61</sup>. With the SNN graph,  
850 we use the “Louvain” algorithm<sup>62</sup>, a community detection algorithm implemented in the R  
851 package “igraph”, to assign topics into clusters. After clustering, similar topics coming from  
852 different chains or posterior samples will be put into the same cluster. In addition to topics

853 ( $\phi$ ), we also assign posterior samples of other hidden variables ( $l$ ,  $\rho$  and  $\alpha$ ) to the  
854 corresponding clusters according to the clustering result for topics.

855 The Louvain algorithm doesn't allow us to directly specify the total number of clusters  
856 (communities) to be found. Instead, the number of clusters is decided by the hyperparameter  
857  $k$  (the number of nearest neighbours to consider) for the construction of the SNN graph. A  
858 large  $k$  will result in a small number of clusters, while a small  $k$  gives rise to a large number  
859 of clusters, though some clusters might be alike. Empirically, we choose  $k = N_{ch} \times \frac{N_{ps}}{2}$ , where  
860  $N_{ch}$  is the number of Gibbs chains for the same treeLFA model, and  $N_{ps}$  is the total number of  
861 posterior samples taken from each chain. This choice is to balance the total number of  
862 clusters found by the algorithm and the uniqueness of different clusters.

### 863 **Post-processing inference results from models with a large number of topics**

864 For models set with a very large number of topics which far exceed the actual number needed  
865 to explain the data (for instance, the treeLFA models set with 50 or 100 topics), multiple near-  
866 empty topics (topics with few active codes having very small probability) will be inferred.  
867 Although the small differences between these near-empty topics are not meaningful, they are  
868 usually assigned to different clusters by the Louvain algorithm. To collapse these near-empty  
869 topics into a single empty topic, we further apply hierarchical clustering on topics averaged  
870 from different clusters given by the Louvain algorithm. During the hierarchical clustering,  
871 similar topics are kept being combined until all the remaining topics are significantly different  
872 from each other. By visualising the inferred topics using heatmap, one can roughly decide  
873 the number of distinct meaningful topics (topics that are not empty or near-empty) to keep,  
874 and then set the number of clusters (topics) to keep for the hierarchical clustering.

## 875 **Genetic analyses**

### 876 **topic-GWAS and single code GWAS**

877 To find genetic variants influencing individuals' risks for topics of diseases, we perform GWAS  
878 using inferred topic weights as continuous traits (topic-GWAS). Since topic weights are real  
879 numbers in the range of 0 to 1, the basic assumptions of linear regression do not hold. We  
880 apply a logit transformation on topic weights to address this issue before fitting the standard  
881 linear model for GWAS. We validate that using logit transformation gives better results than  
882 using rank based inverse normal transformation and using no transformation on topic  
883 weights. The validation is done by comparing the number of significant loci found by different  
884 methods, and the predictive performance of PRS for single codes based on topic-GWAS  
885 results (see section below). For topic-GWAS, we only include common SNPs (SNPs with a  
886 minor allele frequency (MAF) larger than 0.01 in the UK Biobank) and individuals who self-  
887 report having British ancestry in the training dataset (343,006 individuals in total). Sex, age  
888 and the first ten principal components (PCs) of genomic variation are controlled for.

889 For comparison, we also perform GWAS (logistic regression) using the presence and  
890 absence of single ICD-10 codes as binary traits (single code GWAS). The inclusion criterion  
891 for individuals, SNPs and covariates are the same as topic-GWAS. In addition to ICD-10  
892 codes, we also use terminal Phecodes mapped from the top 100 ICD-10 codes as traits for

893 single code GWAS. Phecodes are defined by systematically grouping terminal ICD-10 codes  
894 into more applicable medical terms based on the judgements of clinicians and researchers  
895 <sup>63</sup>, which reduces the granularity of terminal ICD-10 codes. Similar to ICD-10 codes, there is  
896 also a hierarchical coding system for Phecodes. To map the ICD-10 codes used in the top-  
897 100 UKB dataset to phecodes, we firstly extract all terminal ICD-10 codes (on the fifth layer  
898 of the ICD-10 tree) that are children codes of the 100 level-4 ICD-10 codes, and then retrieve  
899 their corresponding Phecodes according to the Phecode map  
900 (<https://phewascatalog.org/phecodes>) In total, there are 296 terminal Phecodes mapped from  
901 the 100 ICD-10 codes.

## 902 **Inflation in P-values given by topic-GWAS**

903 Inflation in P-values are observed for the topic-GWAS results given by all three topic models.  
904 The inflation can either be resulted from true polygenicity of the traits (topic weights), or  
905 stratification in the population. To differentiate these two possibilities, we carry out the LD  
906 score regression (LDSC) <sup>64,65</sup> using the summary statistics of topic-GWAS for all topics. Pre-  
907 computed LD scores (based on 1000 Genomes European data) are downloaded and used  
908 in the analyses as recommended <sup>65</sup>. The genomic control inflation factor  $\lambda_{GC}$  and the intercept  
909 of LDSC are output by the algorithm, and compared with each other. A large  $\lambda_{GC}$  and small  
910 intercept for the same trait suggest true polygenicity causing the inflation in P-values, while  
911 large values for both  $\lambda_{GC}$  and intercept suggest stratification in the population.

## 912 **Processing GWAS results**

913 To define genomic loci from significant SNPs ( $P < 5 \times 10^{-8}$ ) found by GWAS, we use the  
914 clumping function implemented in PLINK-1.9.  $r^2 > 0.1$  is used as the threshold for clumping  
915 SNPs in linkage disequilibrium (LD). We define a loci to be an association for both topic-  
916 GWAS and single code GWAS as follows: the significant lead SNP found by one GWAS  
917 method can be clumped with a significant lead SNP found by the other method.

## 918 **GWAS on internal disease codes on the tree**

919 In addition to grouping disease codes via topic modelling, we also group disease codes  
920 completely following the medical ontologies (ICD-10 and Phecode systems). In other words,  
921 we use internal codes (such as blocks of categories of diseases and chapters of disease,  
922 corresponding to the nodes in the third and second layers of the ICD-10 coding system) of  
923 the two disease classification systems as binary traits for single code GWAS. For instance, if  
924 both disease codes A and B are under a common parent code C on the tree, then C will be  
925 used as the trait for GWAS, and individuals who are diagnosed with either A or B will be used  
926 as cases for the single code GWAS for code C. For the 100 ICD-10 codes there are 68  
927 internal codes, and for the 296 Phecodes there are 136 internal codes.

## 928 **Comparison of topic-GWAS results for the three topic models**

929 In addition to topics inferred by treeLFA, topic-GWAS for flatLFA and LDA inferred topics are  
930 also performed. For LDA, only individuals with at least one diagnosed disease code are used  
931 as input for inference. For topic-GWAS, there are two options to deal with the individuals  
932 without any diagnosis. We can either exclude them or include them and give them small

933 random weights for all disease topics. We experiment with both methods, and find that  
934 excluding the completely healthy individuals results in a larger power for topic-GWAS.

## 935 Validation of topic-associated loci

### 936 **Validation using the GWAS Catalogue**

937 We check the GWAS Catalogue<sup>56</sup> to see if topic-associated loci were also found by previous  
938 GWAS as significant. We download the full GWAS Catalogue<sup>66</sup>, and clump all SNPs in it to  
939 topic-associated lead SNPs ( $r^2 > 0.5$  as threshold). If a topic-associated lead SNP found by us  
940 can be clumped, it means that a SNP in LD with it was found by a previous GWAS as  
941 significant.

### 942 **Validation using functional genomic resources**

943 Integrated analysis of GWAS results and functional genomic datasets has gained popularity  
944 in recent years<sup>56,67</sup>. Checking the enrichment of genomic annotations among topic-  
945 associated loci (lead SNPs) is another angle of validation. We obtain various genomic  
946 annotations for topic-associated loci using the software “FUMA”<sup>68,69</sup>. Since most topics only  
947 have a small number of associated loci, we combine all loci (lead SNPs) that are associated  
948 with at least one topic and perform analyses on them as a whole. Meanwhile, we also perform  
949 the same analyses on all single code associated lead SNPs and 10,000 random SNPs  
950 sampled from all SNPs used in the GWAS (the distribution of their MAF are matched to all  
951 topic-associated SNPs) for comparison. The assumption made here is that if topic-GWAS  
952 find true associations, then the significant SNPs should have an enrichment profile that is  
953 similar to single code associated SNPs (positive control) and different from randomly selected  
954 SNPs (negative control).

955 Three types of functional annotations are used for the validation of topic-associated lead  
956 SNPs. Firstly, the three groups of loci (lead SNPs) are annotated using the 15-core chromatin  
957 states predicted by the chromHMM algorithm<sup>57</sup>. Since the predicted chromatin states in the  
958 127 available types of tissues are different, for each genomic locus we use the smallest  
959 chromatin state across all tissues. Secondly, we calculate the proportions of lead SNPs in  
960 the three groups that are eQTL (expression quantitative trait loci) in different tissues using  
961 the eQTL mapping function implemented in FUMA, based on the GTEx8 dataset<sup>70,71</sup>. Thirdly,  
962 we calculate the proportions of lead SNPs having chromatin interactions with other genomic  
963 regions in different tissues, based on the HiC data from the GSE87112 dataset<sup>70</sup>. The default  
964 setting of FUMA for parameters is used in all the analyses. The two proportion z-test is used  
965 to test for significant differences between the proportions of two groups.

### 966 **Genetic risk prediction based on topic-GWAS results**

#### 967 **PRS for topics**

968 Another way to validate topic-GWAS results is to use them for prediction tasks on the test  
969 data. Because individual variants' effects on traits of interest are usually small, polygenic risk  
970 scores (PRS) are constructed to aggregate the effects of tens of thousands of variants. With  
971 topic-GWAS carried out on the training data, PRS for topic weights (traits of topic-GWAS) are

972 constructed using the software “PRSSice-2”<sup>72</sup>, which uses a “C+T” (clumping and  
973 thresholding) method. No threshold for P-values is manually set for the inclusion of SNPs.  
974 We use the test data to evaluate PRS for topics constructed on the training data. Topic  
975 weights for individuals in the testing dataset are inferred by running the Gibbs sampler for  
976 treeLFA on them, with  $\phi$  and  $\alpha$  fixed at values learnt from the training data (averaged from all  
977 posterior samples from all Gibbs chains). Ten Gibbs chains are simulated to infer topic  
978 weights for individuals in the testing dataset, and 50 posterior samples are collected from  
979 each chain, and their average is used in the subsequent analyses. With inferred topic  
980 weights, linear models are fit to evaluate the associations of PRS for topics and the  
981 corresponding topic weights, using the logit transformed topic weights as response variables,  
982 and PRS for topics as independent variables. The heritabilities of topic weights are estimated  
983 using LDSC as a reference.

#### 984 **PRS for single codes based on topic-GWAS results**

985 To evaluate topic-GWAS results using single code GWAS results as reference, and to  
986 compare the topic-GWAS results for different topics models (such as treeLFA and LDA)  
987 under a common criterion, we construct two types of PRS for single ICD-10 codes using  
988 single code and topic-GWAS results, respectively. PRS based on single code GWAS are  
989 constructed in the standard way. As for PRS based on topic-GWAS, for code  $s$  we extract its  
990 probabilities in all topics ( $\phi_{ts}$ ), and calculate an individual’s PRS for it as:  $PRS_s =$   
991  $\sum_{t=1}^T (PRS_t \times \phi_{ts})$ , where  $PRS_t$  is the individual’s PRS for topic  $t$  (constructed using the topic-  
992 GWAS result for topic  $t$ ). The area under the receiver-operator curve (AUC) is used to  
993 evaluate the predictive performance of PRS on the test data.

### 994 **Analyses on the larger UKB dataset**

#### 995 **The input data**

996 The larger UKB dataset (top-436 dataset) is constructed in the same way as the top-100 UKB  
997 dataset, and contains the diagnostic records of the top 436 most frequent ICD-10 codes from  
998 the first 14 chapters of the ICD-10 coding system for all individuals in UKB. These codes are  
999 all the ones in UK Biobank with a prevalence of at least 0.001 at the date of selection  
1000 (continued data collection means that prevalence will tend to increase over time),  
1001 corresponding to approximately 500 cases. The prevalence threshold of 0.001 is chosen both  
1002 for computational reasons (this is roughly the limit of what can be performed using available  
1003 computing resources) and because there must be sufficient occurrences of diseases from  
1004 which to discover multi-morbidity clusters. As with the top-100 dataset, we partition the full  
1005 top-436 dataset into training (80%) and testing (20%) datasets. The top-436 and the top-100  
1006 datasets use different partitions for the training and testing datasets.

#### 1007 **Inference on the top-436 UKB dataset**

1008 Training strategy for the top-436 dataset

1009 The top-436 dataset is more than three times larger than the top-100 dataset, increasing the  
1010 computational requirements for training topic models. On the top-100 dataset, treeLFA



1011 models with different numbers of topics are trained and compared. We find that when we set  
1012 an excess number of topics for the model, both inferred topics and topic-GWAS results are  
1013 stable across different models (Figure 5). Therefore, on the top-436 dataset, instead of  
1014 training many models with different numbers of topics, we train treeLFA and flatLFA models  
1015 with 100 topics, and cluster and collapse the inferred topics to combine all near-empty topics  
1016 into a single one.

1017 For the optimization of  $\alpha$ , the two-stage training strategy with the GibbsEM algorithm is used  
1018 again. 1,500 iterations are run in the first stage (with a single posterior sample of Z collected  
1019 in the E-step), and 350 iterations are run in the second stage (with 10 posterior samples of Z  
1020 collected in the E-step). 50 posterior samples of hidden variables are collected during the last  
1021 50 iterations for Gibbs-EM (with an interval of 200 iterations for the Gibbs sampling). For both  
1022 treeLFA and flatLFA, three Gibbs chains are simulated.

1023 Choice of hyperparameters and initialization of hidden variables

1024  $\alpha$  is initialised as (1,0.1,...,0.1). Beta(0.1,3000) and Beta(1.2,3) are used as the prior for  $\phi$  of  
1025 inactive and active codes to account for diseases with small prevalence. The rest hidden  
1026 variables and hyperparameters are set in the same way as for the top-100 dataset.

1027 Processing inference result

1028 We find that different Gibbs chains for treeLFA and flatLFA give slightly different inference  
1029 results on the top-436 UKB dataset, while different posterior samples from the same chain  
1030 have a very high level of consistency. Considering the variability among the inference results  
1031 given by different chains, instead of clustering posterior samples of topics from all chains  
1032 altogether, we cluster posterior samples from different chains separately. With the averaged  
1033  $\phi$  and  $\alpha$  for different chains, we calculate their predictive likelihood on the test data, and for  
1034 both treeLFA and flatLFA we retain the chain which has the largest predictive likelihood, and  
1035 use its inference result as the input for downstream analyses. For each topic inferred by the  
1036 chain with the largest predictive likelihood, we check the inference results of the other chains,  
1037 and annotate the topic with the number of chains that infer them to give a reference of its  
1038 reliability.

1039 **Genetic analyses**

1040 topic-GWAS for the larger UKB dataset

1041 Since the top-436 dataset is much larger than the top100 dataset, to increase the inference  
1042 accuracy for topic weights, after the training with Gibbs-EM algorithm we use Gibbs sampling  
1043 to re-estimate individuals' topic weights, which is observed to increase the power of topic-  
1044 GWAS.  $\phi$  and  $\alpha$  are fixed at values averaged from all posterior samples from the chain with  
1045 the largest predictive likelihood. As a result, there is no longer an identifiability issue, so the  
1046 results given by different chains (for the re-estimation of topic weights) can be combined  
1047 directly. For both treeLFA and flatLFA, ten Gibbs chains are used to re-estimate topic  
1048 weights, and 50 posterior samples are collected from each chain. Topic weights averaged  
1049 from these chains are used as the input for topic-GWAS.

1050 Gene-set enrichment analysis for topic-associated SNPs

1051 The software FUMA can find genes that are close to the significant SNPs found by GWAS  
1052 on the genome (the physical mapping function of FUMA). With the mapped genes, further  
1053 analyses can be performed. Gene-set enrichment analysis (GSEA) tests for the enrichment  
1054 of different gene sets among a group of genes. We choose genes that are associated with  
1055 different traits in the GWAS catalogue as the reference gene sets to carry out GSEA for  
1056 genes mapped from topic associated SNPs. By doing this, we can summarise the major  
1057 associations of topic-associated SNPs found by previous GWAS. The default setting for  
1058 FUMA is used in all the analyses in this section.

## 1059 Resource availability

### 1060 Lead Contact

1061 Further information and requests for resources should be directed to and will be fulfilled by  
1062 the lead contact, Gil McVean ([gil.mcvean@bdi.ox.ac.uk](mailto:gil.mcvean@bdi.ox.ac.uk)).

### 1063 Materials availability

1064 The key inference results (inferred topics) of the topic models and the topic-GWAS results  
1065 are included in the supplementary material of the paper. The remaining results will be made  
1066 available via the UK Biobank data return and linked to UK Biobank application  
1067 number: 12788.

### 1068 Data and Code Availability

1069 This research has been conducted using the UK Biobank Resource: application number  
1070 12788. The genotype data used for GWAS in this study comes from data field “22418” in UK  
1071 Biobank. The diagnosis data used for topic modelling comes from data fields “41202” and  
1072 “41204” in UK Biobank.

1073 The code for the treeLFA algorithm and a demo for using it on example data is available at:  
1074 <https://github.com/zhangyd10/treeLFA-demo> or <https://doi.org/10.5281/zenodo.7420615>.

1075

1076

1077 **Supplementary Information**

1078 **Description of Supplementary Data**

1079 Supplementary information includes 11 figures, 39 tables, and the analytical note.

1080 **Supplementary Figures**

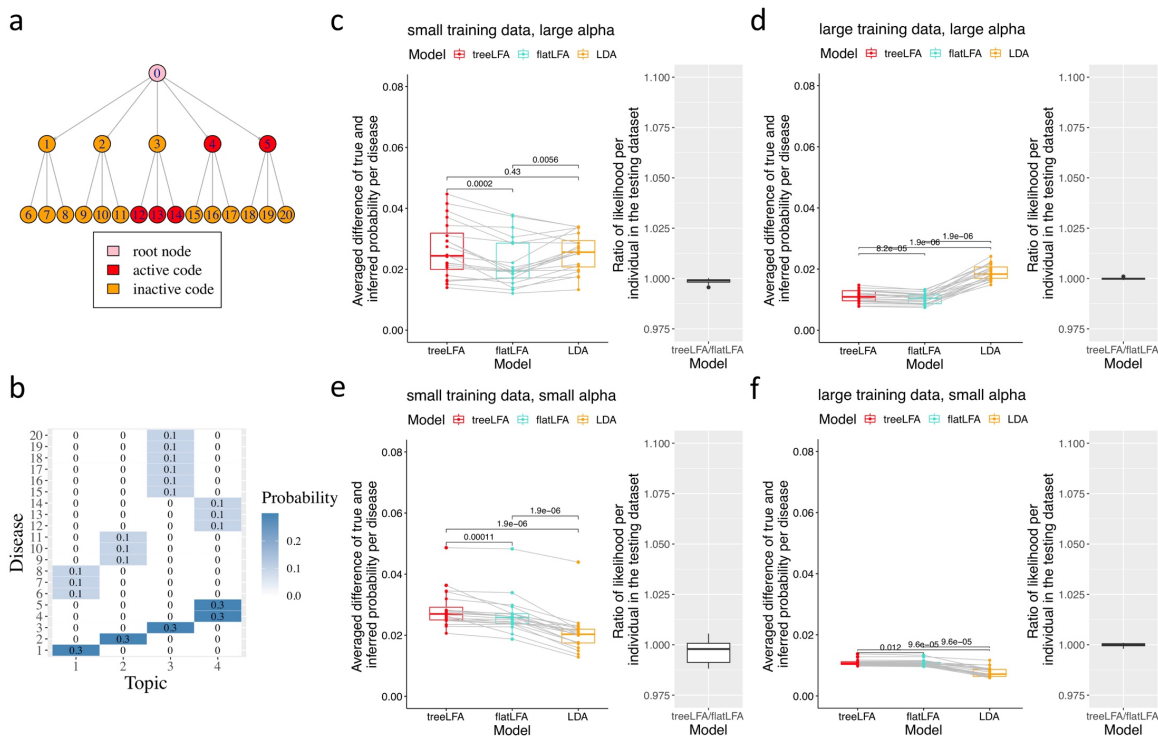

1081

1082 **Supplementary Figure 1 Comparison of three related topic models (treeLFA, flatLFA**  
 1083 **and LDA) on simulated datasets.**

1084 a, The tree structure of 20 diseases. Red nodes correspond to the active codes in Topic 4 in panel b.  
 1085 b, The four topics used for simulation. Active codes in these topics are unlikely to be generated by a  
 1086 Markov process with small probability of transforming from inactive to active and large probability of  
 1087 staying active while going from the parent node to its children nodes, since an active parent code always  
 1088 has inactive children codes, while active children codes always have inactive parent code.  
 1089 c-f Comparison of three topic models on simulated datasets. The Parameter setting and metrics are the  
 1090 same as those in Figure 2. c, Results on datasets simulated using  $D=2500$  and  $\alpha=1$ . d, Results on  
 1091 datasets simulated using  $D=5000$  and  $\alpha=1$ . e, Results on datasets simulated using  $D=300$  and  $\alpha=0.1$ .  
 1092 f, Results on datasets simulated using  $D=1000$  and  $\alpha=0.1$ . The numeric results are in Supplementary  
 1093 Table 23.

1094

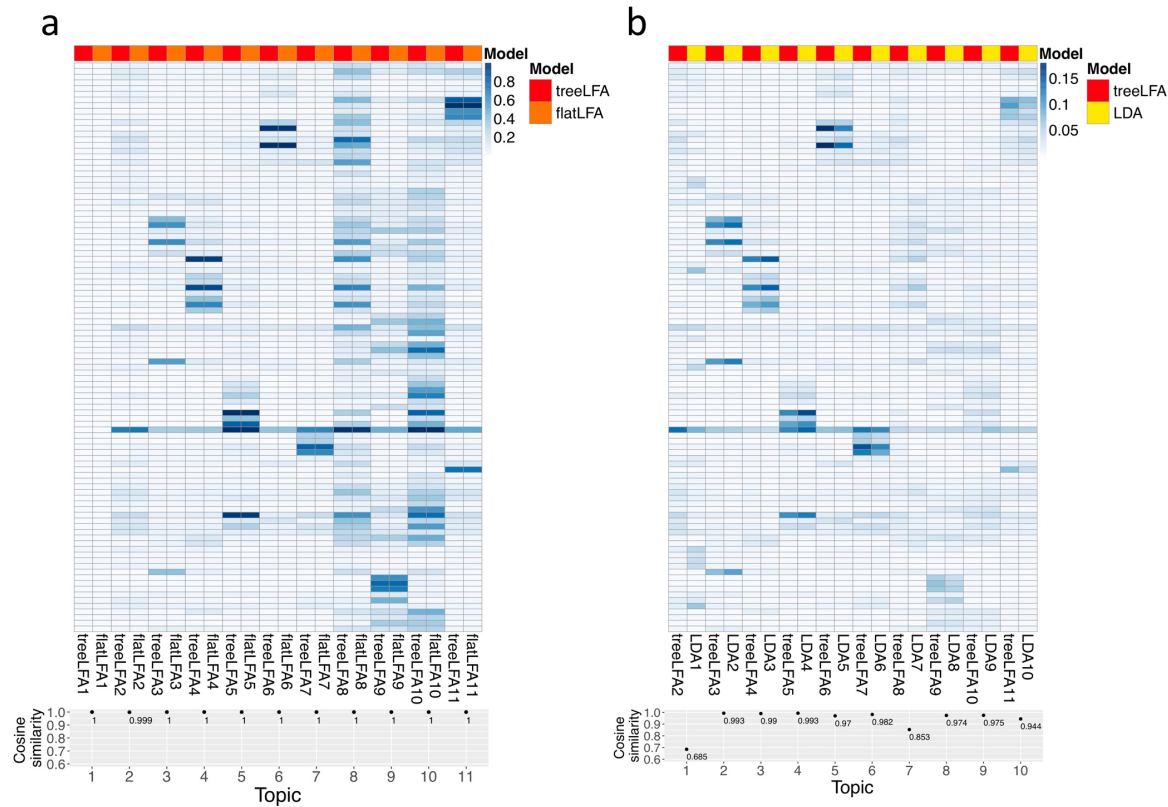

1095  
1096  
1097  
1098  
1099  
1100  
1101  
1102  
1103  
1104  
1105  
1106  
1107

**Supplementary Figure 2 Comparison of topics inferred by three topic models on the top-100 UKB dataset.**

a, Comparison of the 11 topics inferred by treeLFA and flatLFA. The same topics inferred by the two models are placed next to each other. Cosine similarity was used to measure the similarity of topics inferred by the two models (point plot below the heatmap). The numeric results are in Supplementary Table 4,24.

b, Comparison of the 10 topics inferred by LDA and the 10 non-empty topics inferred by treeLFA. Topics inferred by treeLFA are normalised such that probabilities of the 100 ICD-10 codes add up to 1 in any topic. The same topics inferred by the two models are placed next to each other. Cosine similarity was used to measure the similarity of topics inferred by the two models (point plot below the heatmap). The numeric results are in Supplementary Table 4,25.

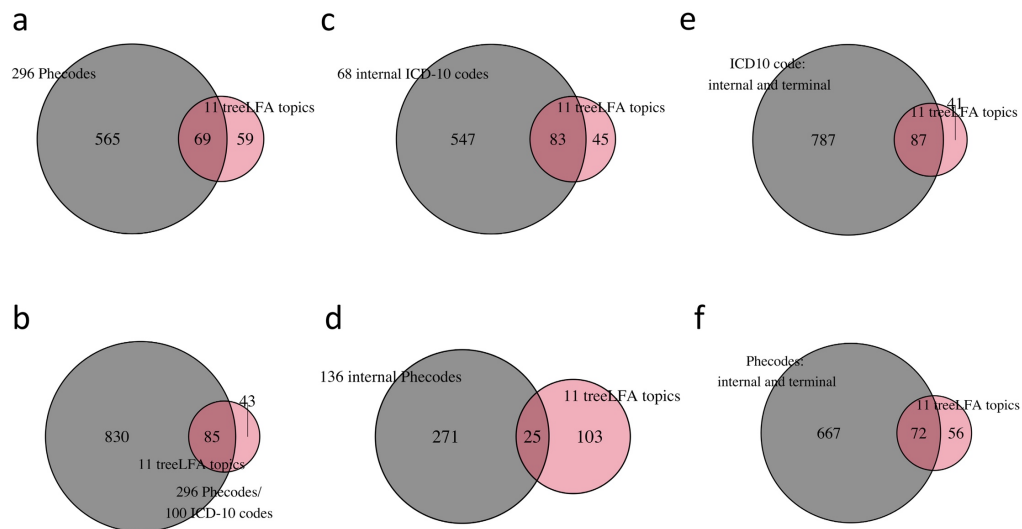

1108  
1109  
1110  
1111  
1112  
1113  
1114  
1115  
1116  
1117  
1118  
1119  
1120  
1121  
1122

**Supplementary Figure 3 Overlap of significant loci found by GWAS for different traits.**

- a, The total numbers of loci associated with any of the 296 Phecodes mapped from the 100 ICD-10 codes and any of the 11 treeLFA topics, and their overlap.
- b, The total numbers of loci associated with any of the 296 Phecodes or the 100 ICD-10 codes and any of the 11 treeLFA topics, and their overlap.
- c, The total numbers of loci associated with any of the 68 internal ICD-10 codes and any of the 11 treeLFA topics, and their overlap.
- d, The total numbers of loci associated with any of the 136 internal Phecodes and any of the 11 treeLFA topics, and their overlap.
- e, The total numbers of loci associated with any of the internal or terminal ICD-10 codes and any of the 11 treeLFA topics, and their overlap.
- f, The total numbers of loci associated with any of the internal or terminal Phecodes and any of the 11 treeLFA topics, and their overlap.

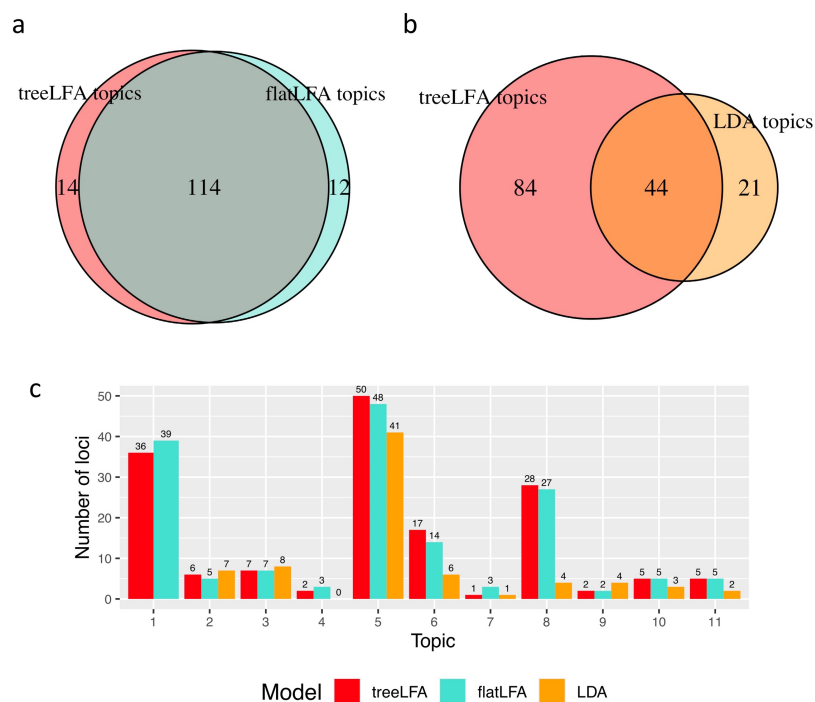

1123  
 1124  
 1125  
 1126  
 1127  
 1128  
 1129  
 1130  
 1131  
 1132  
 1133

**Supplementary Figure 4 Comparison of the topic-GWAS results for three topic models.**

a, The total numbers of loci associated with any of the 11 topics inferred by treeLFA and flatLFA, and their overlap.

b, The total numbers of loci associated with any of the 11 topics inferred by treeLFA and any of the 10 topics inferred by LDA, and their overlap.

c, The numbers of loci associated with each of the 11 topics inferred by treeLFA and flatLFA, and each of the 10 topics inferred by LDA. The first topic is the empty topic, and is only inferred by treeLFA and flatLFA.

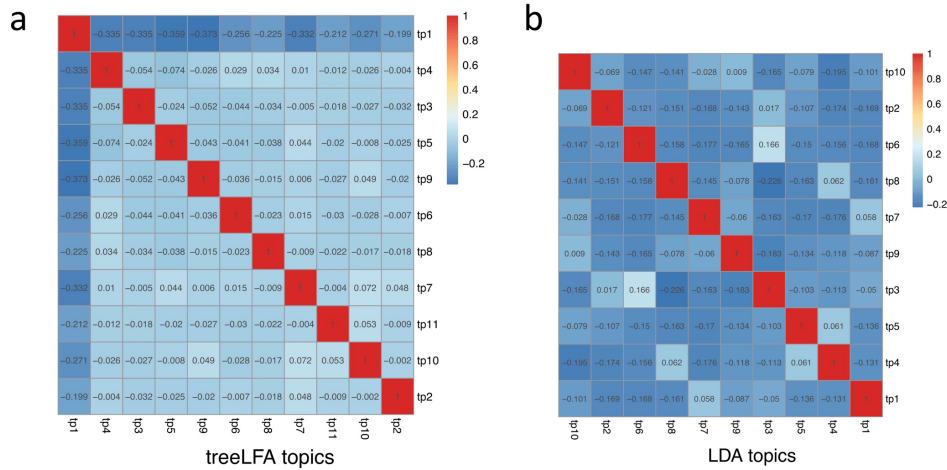

1134  
1135  
1136  
1137  
1138  
1139  
1140  
1141

**Supplementary Figure 5 Correlation of topic weights for topics inferred by treeLFA and LDA.**

a, The correlation matrix for individuals' weights for the 11 topics inferred by treeLFA. The first topic is the empty topic.  
b, The correlation matrix for individuals' weights for the 10 topics inferred by LDA. The matrix uses the same colour scheme as the matrix in panel a.

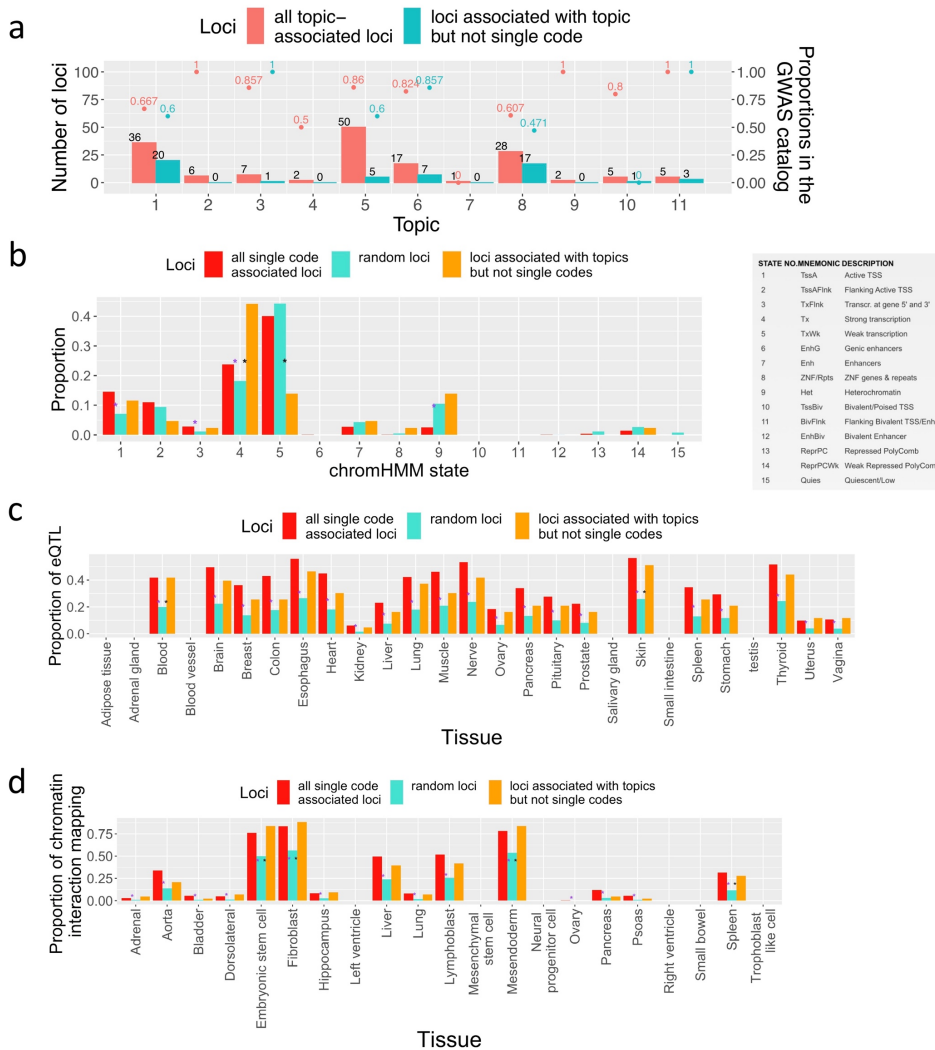

1142  
1143  
1144  
1145  
1146  
1147  
1148  
1149  
1150  
1151  
1152  
1153  
1154  
1155  
1156  
1157  
1158  
1159  
1160  
1161  
1162

**Supplementary Figure 6 Validation of topic associated loci.**

a, The proportions of topic-associated loci recorded in the GWAS catalogue. Red bars show the results for all topic-associated loci, and green bars show the results for loci that are associated with topics but not any single code.

b, Proportions of three groups of SNPs that are in different chromHMM states. Meanings of different chromHMM states are shown in the right table. The first group contains lead SNPs associated with at least one ICD-10 code; the second group contains 10,000 random SNPs whose allele frequency is matched with that of topic-associated lead SNPs; The third group contains lead SNPs associated with at least one of the 11 topics but not any single code. The proportions of the first and third groups are compared with the second group respectively, and significant differences in proportions (two-proportion Z-test, adjusted P-value<0.05, Bonferroni correction) are marked with asterisks between the corresponding bars (purple asterisks between red and green bars mean significant differences between the first and second groups, black asterisks between blue and green bars mean significant differences between the third and second groups). The numeric results are in Supplementary Table 26.

c, Proportions of the three groups of SNPs in panel b that are eQTL in different tissues. The numeric results are in Supplementary Table 27.

d, Proportions of the three groups of SNPs in panel b that have chromatin interaction with genes in different tissues. The numeric results are in Supplementary Table 28.



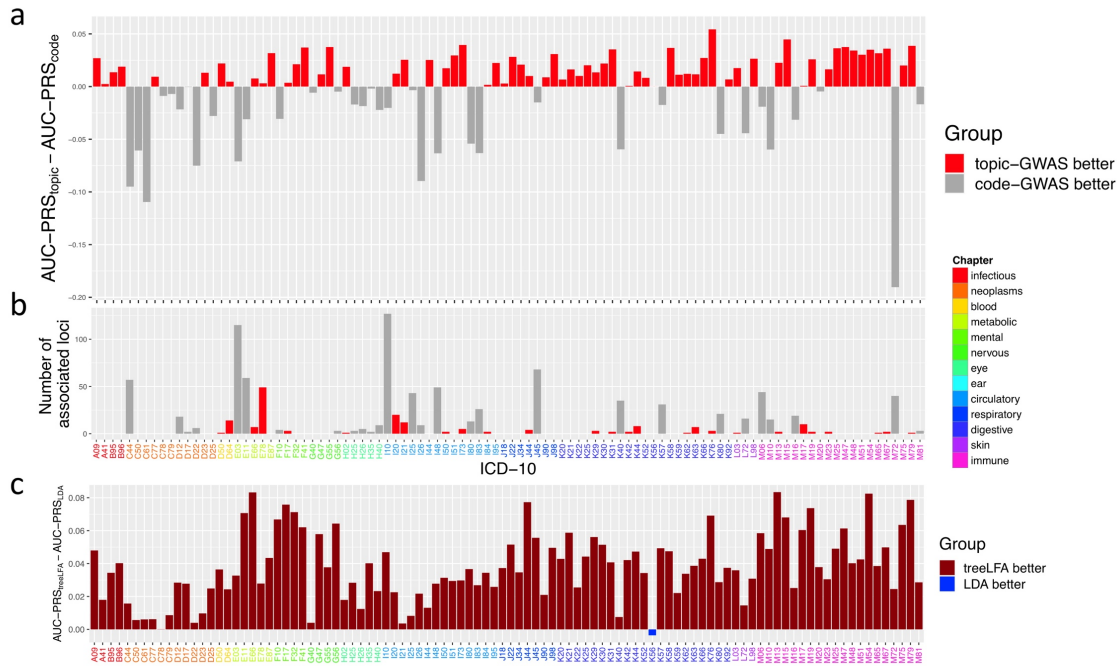

1163

1164

**Supplementary Figure 7 PRS for ICD-10 codes based on topic-GWAS results.**

1165 a, Comparison of the AUC of two types of PRS for the 100 ICD-10 codes on the test data. One type of

1166 PRS is constructed using the topic-GWAS result for treeLFA, and the other type of PRS is constructed

1167 using single code GWAS result. Bars are colored according to the relative performance of the two

1168 types of PRS. The numeric results are in Supplementary Table 10.

1169 b, The numbers of loci associated with each of the 100 ICD-10 codes. Bars are colored the same way

1170 as in panel a. Codes are colored according to the ICD-10 chapters they belong to. The numeric

1171 results are in Supplementary Table 29.

1172 c, Comparison of the AUC of PRS constructed using the topic-GWAS results for treeLFA and LDA.

1173 Bars are colored according to the relative performance of the two types of PRS. The numeric results

1174 are in Supplementary Table 30.

1175

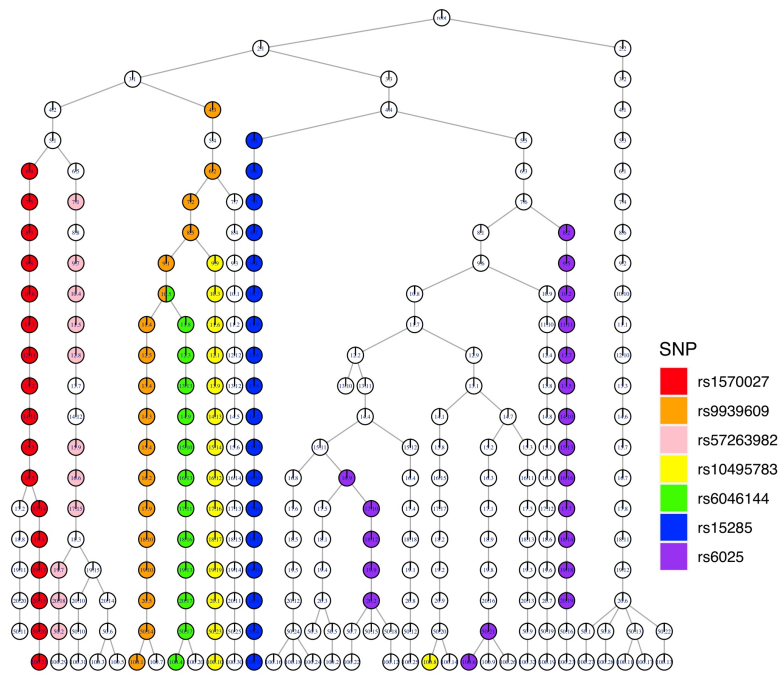

1176

1177

1178

**Supplementary Figure 8 Association of SNPs and topics from different treeLFA models.**

1179

The associations of a few example SNPs and topics inferred by different treeLFA models are

1180

visualised on the tree structure of topics. The tree structure of topics is the same as the one in Figure

1181

5b. Topics significantly associated with 7 different SNPs are highlighted with different colours on the

1182

tree structure. The numeric results are in Supplementary Table 31.

1183

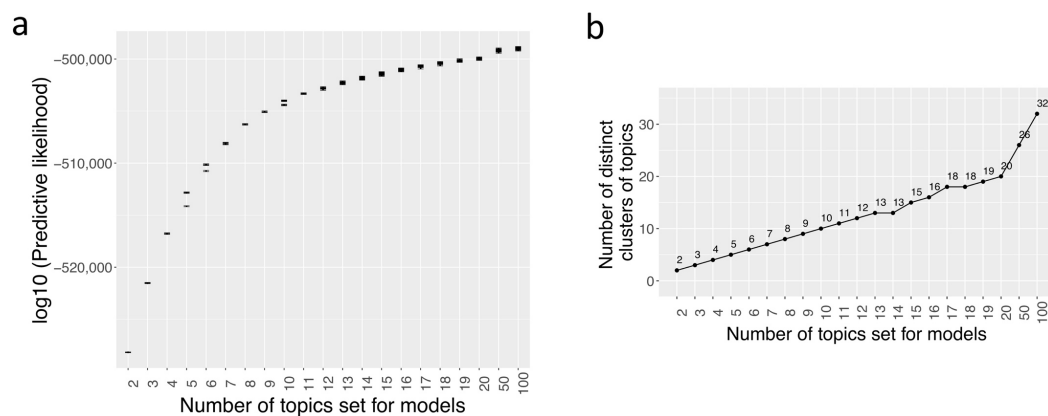

1184  
1185  
1186  
1187  
1188  
1189  
1190  
1191  
1192

**Supplementary Figure 9 Summary statistics for models with different numbers of topics.**

a, The predictive likelihood on the test data for the ten Gibbs chains for treeLFA models set with different numbers of topics. For each chain, the standard deviation of the likelihood calculated using different posterior samples of topics were shown. The numeric results are in Supplementary Table 32.

b, Numbers of distinct topics remained after clustering for treeLFA models set with different numbers of topics.

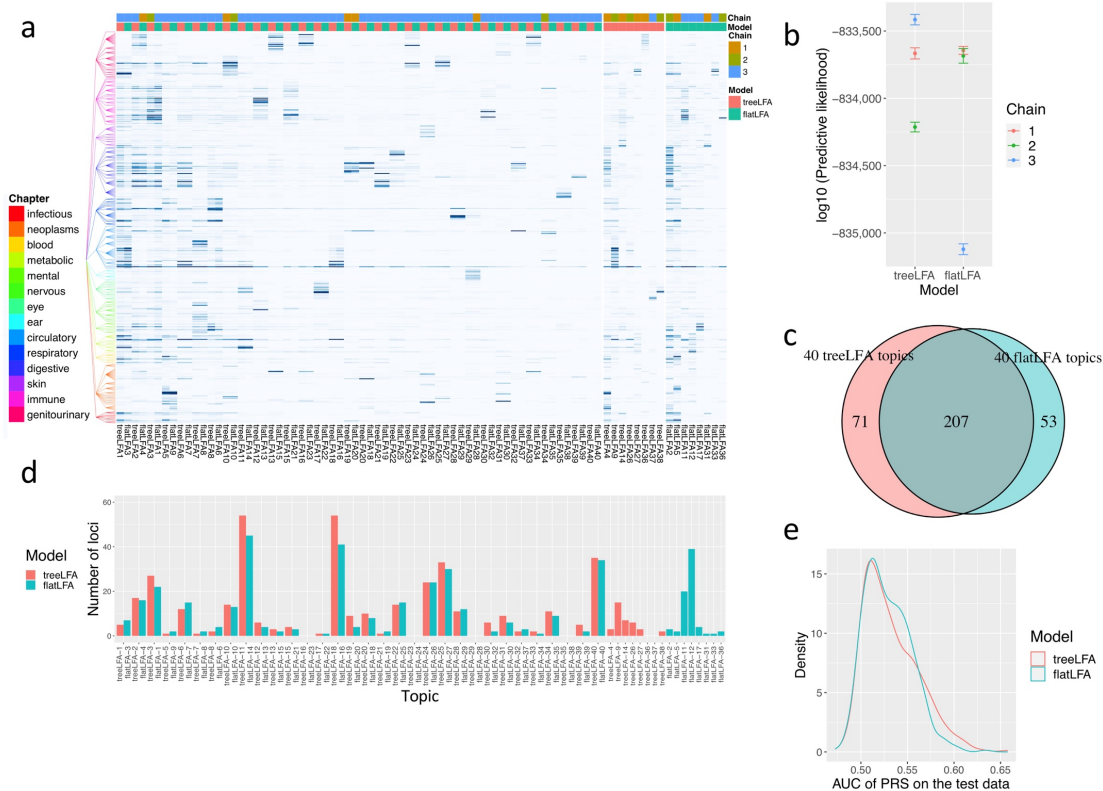

1193  
1194  
1195  
1196  
1197  
1198  
1199  
1200  
1201  
1202  
1203  
1204  
1205  
1206  
1207  
1208  
1209  
1210  
1211  
1212

**Supplementary figure 10 Comparison of the inference and topic-GWAS results for treeLFA and flatLFA on the top-436 UKB dataset.**

a, 40 topics inferred by treeLFA and flatLFA models set with 100 topics. The same topics inferred by treeLFA and flatLFA are placed next to each other. Topics inferred by both models are shown first, followed by topics inferred by only one model. For each model, the inferred topics are numbered according to their density. The tree structure of the 436 ICD-10 codes is shown to the left of the heatmap, and codes from different ICD-10 chapters are colored differently. For each topic, the number of chains that inferred it is shown with the colour bar on top of the heatmap. The numeric results are in Supplementary Table 33.

b, The predictive likelihood on the test data for the three treeLFA and flatLFA chains. The calculation of predictive likelihood was repeated ten times for each chain to get the standard deviation. The numeric results are in Supplementary Table 34.

c, The total numbers of loci associated with any of the topics inferred by treeLFA and flatLFA, and their overlap.

d, The numbers of loci associated with each of the treeLFA and flatLFA topics. Topics have the same order as those in panel a. The numeric results are in Supplementary Table 35.

e, Density plots for the AUC of PRS for the 436 ICD-10 codes on the test data based on the topic-GWAS results for treeLFA and flatLFA. The numeric results are in Supplementary Table 36.

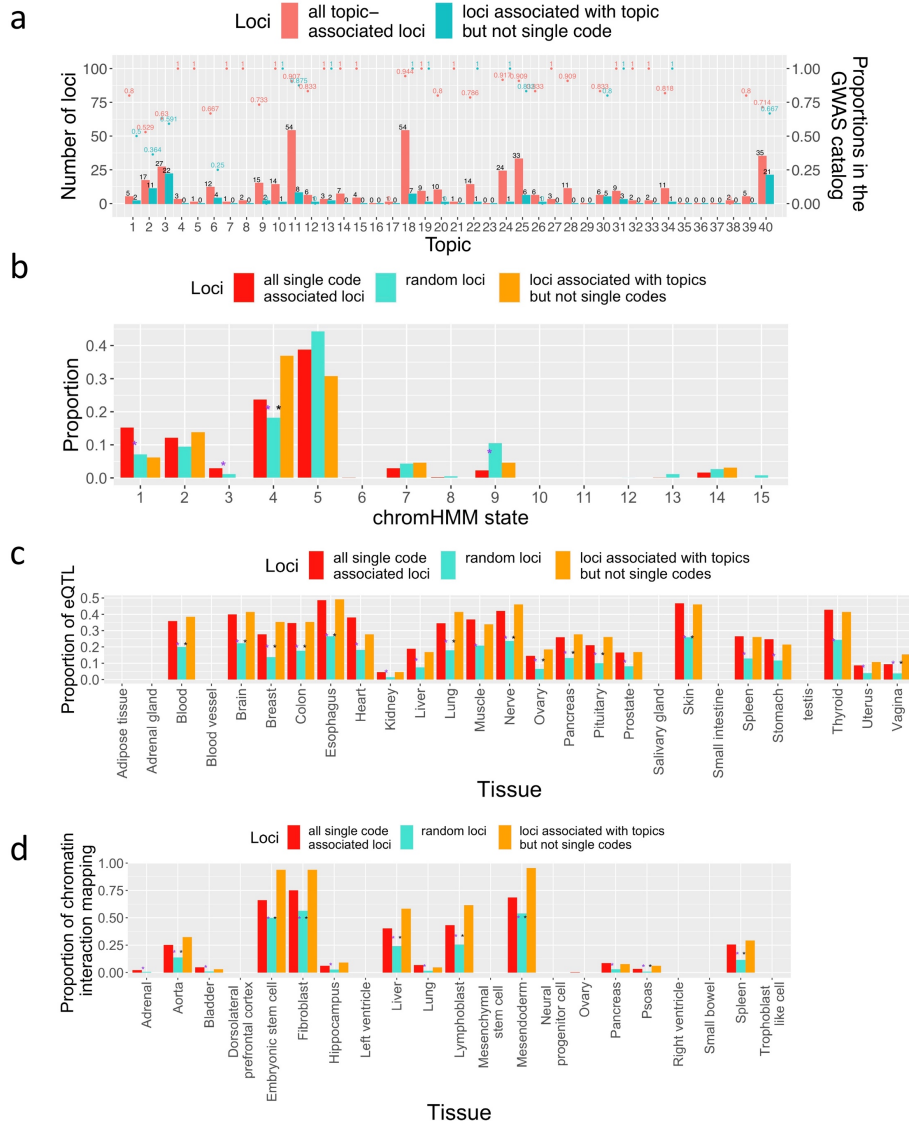

1213  
1214  
1215  
1216  
1217  
1218  
1219  
1220  
1221  
1222  
1223  
1224

**Supplementary figure 11 Validation of topic associated loci for the top-436 UKB dataset.**

All settings are the same as those in Supplementary Figure 6.

a, The proportions of topic-associated loci recorded in the GWAS catalogue.

b, Proportions of the three groups of SNPs that are in different chromHMM states. The numeric results are in Supplementary Table 37.

c, Proportions of the three groups of SNPs in panel b that are eQTL in different tissues. The numeric results are in Supplementary Table 38.

d, Proportions of the three groups of SNPs in panel b that have chromatin interaction with genes in different tissues. The numeric results are in Supplementary Table 39.

1225

## 1226 Supplementary Tables

1227 **Supplementary Table 1. Parameter setting for all simulated datasets.** 8 groups of  
1228 datasets are simulated using different combinations of three parameters: the concentration  
1229 parameter ( $\alpha$ ) of the Dirichlet prior for topic weight variable  $\theta$ , the number of individuals in  
1230 the training dataset (D), and the tree structure of diseases. Correct tree structure means that  
1231 the topics used for simulation are likely to be constructed by running a Markov process with  
1232 small  $\rho_{01}$  and large  $\rho_{11}$  (see Methods) on the tree structure.

1233 **Supplementary Table 2. Comparison of 3 topic models on the 4 groups of datasets**  
1234 **simulated using correct tree structure of diseases.** Each group contains 20 datasets  
1235 simulated using the same topics and hyperparameters (Supplementary Table 1).  
1236 Phi\_diff\_ave: the averaged per disease difference in probability (Phi) between true and  
1237 inferred topics. I\_diff\_ave: the averaged per disease difference in the values of indicator  
1238 variables (I) between true and inferred topics. Predictive likelihood: predictive likelihood on  
1239 the corresponding test data, which is calculated using the topics inferred from the training  
1240 data.

1241 **Supplementary Table 3. Tree structure of the top-100 most frequent ICD-10 codes from**  
1242 **chapters 1-13 of the ICD-10 coding system in UK Biobank.** In the first column both internal  
1243 and terminal nodes of the tree structure of the top-100 most frequent ICD-10 codes are  
1244 listed (ordered according to the layers of nodes on the tree and the names of nodes). In the  
1245 second column the parent nodes of the nodes in the first column are shown.

1246 **Supplementary Table 4. The 11 topics inferred by treeLFA on the top-100 UKB dataset.**  
1247 The probability of the 100 ICD-10 codes in the 11 topics inferred by the treeLFA model set  
1248 with 11 topics on the top-100 UKB dataset is shown.

1249 **Supplementary Table 5. Topic weights for the 11 topics inferred by treeLFA for 2,000**  
1250 **randomly selected individuals in UKB.**

1251 **Supplementary Table 6. Number of loci associated with individuals' weights for the 11**  
1252 **topics inferred by treeLFA on the top-100 UKB dataset.**

1253 **Supplementary Table 7. Comparison of  $-\log_{10}$  (P-value) for lead SNPs of Topic 5 given**  
1254 **by single code GWAS for the top five active codes in Topic 5 and topic-GWAS for**  
1255 **Topic 5.**

1256 **Supplementary Table 8. Inflation in P-values given by topic-GWAS for the 11 topics**  
1257 **inferred by treeLFA on the top-100 UKB dataset.** Both the intercept and  $\lambda_{GC}$  are given by  
1258 LDSC software (see Methods).  $\lambda_{GC}$ : genomic control inflation factor.

1259 **Supplementary Table 9. Performance of PRS for topics constructed using topic-**  
1260 **GWAS results on the test data.** R2: phenotypic variance of topic weights explained by the  
1261 PRS for topics. P: P-value of model fit on the testing data. Heritability: heritabilities of topic  
1262 weights calculated using the LD score regression and summary statistics of topic-GWAS.  
1263 NUM\_SNP: numbers of SNPs used by the software "PRSice-2" to construct the PRS for  
1264 topics. Threshold: threshold for P-values of SNPs used by "PRSice-2" to construct the PRS  
1265 for topics.

- 1266 **Supplementary Table 10. Comparison of the performance of two types of PRS for the**  
1267 **100 ICD10 codes.** One type of PRS for ICD-10 codes is constructed using topic-GWAS  
1268 results (see Methods), and the other type of PRS is constructed using single code GWAS  
1269 results. AUC: the area under the receiver-operator curve of the PRS on the test data.
- 1270 **Supplementary Table 11. Topics inferred by treeLFA models set with different**  
1271 **numbers of topics on the top-100 UKB dataset.** The probability of the 100 ICD-10 codes  
1272 in topics inferred by treeLFA models set with different numbers of topics on the top-100 UKB  
1273 dataset is shown.
- 1274 **Supplementary Table 12. topic-GWAS results for the example SNP "rs143384" and all**  
1275 **topics inferred by all treeLFA models on the top-100 UKB dataset.** Topics are named  
1276 using the number of topics set for the corresponding treeLFA model, and the index of the  
1277 inferred topic for that model. For instance, topic "10.10" means the 10th topic inferred by the  
1278 treeLFA model set with 10 topics. P: the P-value of the SNP given by the linear regression  
1279 for the topic weight. BETA: estimated effect size of the SNP. SE: standard error of the  
1280 estimated effect size.
- 1281 **Supplementary Table 13. Tree structure of the top-436 most frequent ICD-10 codes**  
1282 **from chapters 1-14 of the ICD-10 coding system in UKB.** In the first column both internal  
1283 and terminal nodes of the tree structure of the top-436 most frequent ICD-10 codes are  
1284 listed (ordered according to the layers of nodes on the tree and the names of nodes). In the  
1285 second column the parent nodes of the nodes in the first column are shown.
- 1286 **Supplementary Table 14. The 40 topics inferred by treeLFA on the top-436 UKB**  
1287 **dataset.** The probability of the 436 ICD-10 codes in the 40 topics inferred by treeLFA on the  
1288 top-436 UKB dataset is shown (see Methods).
- 1289 **Supplementary Table 15. Numbers of active codes from different ICD10 chapters in**  
1290 **the 40 topics inferred by treeLFA on the top-436 UKB dataset (see Methods).**
- 1291 **Supplementary Table 16. Significant SNPs found by topic-GWAS for the 40 treeLFA**  
1292 **inferred topics.** CHR: chromosome. BP: physical position (base pair) of SNP. BETA:  
1293 estimated effect size (regression coefficient). SE: standard error of the estimated effect size.  
1294 Topic: the index of the inferred topic for the corresponding treeLFA model. Model: the  
1295 number of topics set for the treeLFA model.
- 1296 **Supplementary Table 17. Effect sizes of lead SNPs associated with the 40 treeLFA**  
1297 **inferred topics.**
- 1298 **Supplementary Table 18. Numbers of associated loci for the 40 topics inferred by**  
1299 **treeLFA on the top-436 UKB dataset.**
- 1300 **Supplementary Table 19. treeLFA inferred topics with a substantial number of novel**  
1301 **loci found by topic-GWAS.** Dominant ICD10 chapter: the ICD-10 chapter which contributes  
1302 the majority of active codes in the corresponding topic.
- 1303 **Supplementary Table 20. Comparison of the performance of two types of PRS for the**  
1304 **436 ICD10 codes.** One type of PRS for ICD-10 codes is constructed using topic-GWAS  
1305 results (see Methods), and the other type of PRS is constructed using single code GWAS  
1306 results. AUC: the area under the receiver-operator curve of the PRS on the test data.
- 1307 **Supplementary Table 21. Enriched gene sets in the GWAS catalogue among genes**  
1308 **associated with the 40 treeLFA topics.** GeneSet: names of gene sets in the GWAS

1309 catalogue. N: the total numbers of genes in the gene sets. n: the numbers of genes in the  
1310 gene sets that are associated with the treeLFA topics. P-value: P-values of the enrichment  
1311 analyses. adjusted-P: adjusted P-values of the enrichment analyses. Genes: genes in the  
1312 enriched gene sets that are associated with the topics. This table is the output of the “SNP-  
1313 to-gene” function of the software “FUMA”

1314 **Supplementary Table 22. The correspondence between treeLFA inferred topics and**  
1315 **loci level genetically interpretable multimorbidity networks found by the study “A**  
1316 **global overview of genetically interpretable multimorbidities among common**  
1317 **diseases in the UK Biobank”.** The information of the 9 loci level genetically interpretable  
1318 multimorbidity networks found by a previous study using the diagnostic data in UKB is  
1319 shown, together with their corresponding topics inferred by treeLFA on the top-436 UKB  
1320 dataset. The first 5 columns come from the supplementary results of the paper "A global  
1321 overview of genetically interpretable multimorbidities among common diseases in the UK  
1322 Biobank".

1323 **Supplementary Table 23. Comparison of 3 topic models on the 4 groups of datasets**  
1324 **simulated using wrong tree structure of diseases.** Each group contains 20 datasets  
1325 simulated using the same topics and hyperparameters (Supplementary Table 1).  
1326 Phi\_diff\_ave: the averaged per disease difference in probability (Phi) between true and  
1327 inferred topics. I\_diff\_ave: the averaged per disease difference in the values of indicator  
1328 variables (I) between true and inferred topics. Predictive likelihood: predictive likelihood on  
1329 the corresponding test data, which is calculated using the topics inferred from the training  
1330 data.

1331 **Supplementary Table 24. The 11 topics inferred by flatLFA on the top100 UKB dataset.**  
1332 The probability of the 100 ICD-10 codes in the 11 topics inferred by the flatLFA model set  
1333 with 11 topics on the top-100 UKB dataset is shown.

1334 **Supplementary Table 25. The 10 topics inferred by LDA on the top100 UKB dataset.**  
1335 The probability of the 100 ICD-10 codes in the 10 topics inferred by the LDA model set with  
1336 10 topics on the top-100 UKB dataset is shown.

1337 **Supplementary Table 26. Proportions of SNPs in different chromHMM states for the 3**  
1338 **groups of SNPs on the top-100 UKB dataset.** P(random/single code): P-values for the  
1339 comparison of proportions for random/single code-associated SNPs. P(random/topic): P-  
1340 values for the comparison of proportions for random/topic-associated SNPs.

1341 **Supplementary Table 27. Proportions of SNPs that are eQTL in different tissues for**  
1342 **the 3 groups of SNPs on the top-100 UKB dataset.** P(random/single code): P-values for  
1343 the comparison of proportions for random/single code-associated SNPs. P(random/topic): P-  
1344 values for the comparison of proportions for random/topic-associated SNPs.

1345 **Supplementary Table 28. Proportions of SNPs with chromatin mapping in different**  
1346 **tissues for the 3 groups of SNPs on the top-100 UKB dataset.** P(random/single code): P-  
1347 values for the comparison of proportions for random/single code-associated SNPs.  
1348 P(random/topic): P-values for the comparison of proportions for random/topic-associated  
1349 SNPs.

1350 **Supplementary Table 29. Numbers of significant loci given by single code GWAS for**  
1351 **the 100 ICD10 codes.**

1352 **Supplementary Table 30. Comparison of the performance of PRS for the 100 ICD-10**



- 1353 **codes based on topic-GWAS results for treeLFA/LDA inferred topics on the top-100**  
1354 **UKB dataset.** AUC: the area under the receiver-operator curve of the PRS on the test data.
- 1355 **Supplementary Table 31. topic-GWAS results for 7 example SNPs and all topics**  
1356 **inferred by treeLFA models set with different numbers of topics on the top-100 UKB**  
1357 **dataset.** P-values given by topic-GWAS for the examples SNPs are shown. Topics (in the  
1358 first column) are named using the number of topics set for the corresponding treeLFA model,  
1359 and the index of the inferred topic for that model. For instance, topic “10.10” means the 10th  
1360 topic inferred by the treeLFA model set with 10 topics.
- 1361 **Supplementary Table 32. Predictive likelihood for treeLFA models set with different**  
1362 **numbers of topics on the top-100 UKB dataset.** For each treeLFA model, 10 Gibbs  
1363 chains are trained, and 50 posterior samples of topics are collected from each chain. The  
1364 predictive likelihood on the test data is calculated using each posterior sample of topics, and  
1365 standard error of predictive likelihood is calculated for each chain.
- 1366 **Supplementary Table 33. The 40 topics inferred by treeLFA and flatLFA on the top-436**  
1367 **UKB dataset.** The probability of the 436 ICD-10 codes in the 40 topics inferred by treeLFA  
1368 and flatLFA is shown.
- 1369 **Supplementary Table 34. Predictive likelihood on the test data for three treeLFA and**  
1370 **flatLFA chains on the top-436 dataset.** For each chain, the predictive likelihood is  
1371 calculated 10 times.
- 1372 **Supplementary Table 35. Numbers of associated loci for the 40 treeLFA and flatLFA**  
1373 **topics on the top-436 UKB dataset.** Topics are named according to their order in  
1374 Supplementary Table 33.
- 1375 **Supplementary Table 36. Comparison of the performance of PRS for the 436 ICD10**  
1376 **codes based on topic-GWAS results for treeLFA and flatLFA topics.** AUC: the area  
1377 under the receiver-operator curve of the PRS on the test data.
- 1378 **Supplementary Table 37. Proportions of SNPs in different chromHMM states for the 3**  
1379 **groups of SNPs on the top-436 UKB dataset.** P(random/single code): P-values for the  
1380 comparison of proportions for random/single code-associated SNPs. P(random/topic): P-  
1381 values for the comparison of proportions for random/topic-associated SNPs.
- 1382 **Supplementary Table 38. Proportions of SNPs that are eQTL in different tissues for**  
1383 **the 3 groups of SNPs on the top-436 UKB dataset.** P(random/single code): P-values for  
1384 the comparison of proportions for random/single code-associated SNPs. P(random/topic): P-  
1385 values for the comparison of proportions for random/topic-associated SNPs.
- 1386 **Supplementary Table 39. Proportions of SNPs with chromatin mapping in different**  
1387 **tissues for the 3 groups of SNPs on the top-436 UKB dataset.** P(random/single code): P-  
1388 values for the comparison of proportions for random/single code-associated SNPs.  
1389 P(random/topic): P-values for the comparison of proportions for random/topic-associated  
1390 SNPs.

1391

1392

## 1393 References

- 1394 1. Garin, N., Koyanagi, A., Chatterji, S., Tyrovolas, S., Olaya, B., Leonardi, M. et al. Global  
1395 Multimorbidity Patterns: A Cross-Sectional, Population-Based, Multi-Country Study. *J.*  
1396 *Gerontol. A Biol. Sci. Med. Sci.* **71**, 205–214 (2016).
- 1397 2. Fortin, M., Stewart, M., Poitras, M.-E., Almirall, J. & Maddocks, H. A Systematic Review  
1398 of Prevalence Studies on Multimorbidity: Toward a More Uniform Methodology. *The*  
1399 *Annals of Family Medicine* vol. 10 142–151 (2012).
- 1400 3. Violan, C., Foguet-Boreu, Q., Flores-Mateo, G., Salisbury, C., Blom, J., Freitag, M. et al.  
1401 Prevalence, determinants and patterns of multimorbidity in primary care: a systematic  
1402 review of observational studies. *PLoS One* **9**, e102149 (2014).
- 1403 4. Ryan, A., Wallace, E., O'Hara, P. & Smith, S. M. Multimorbidity and functional decline in  
1404 community-dwelling adults: a systematic review. *Health Qual. Life Outcomes* **13**, 168  
1405 (2015).
- 1406 5. Mair, F. S. & May, C. R. Thinking about the burden of treatment. *BMJ* **349**, (2014).
- 1407 6. Van Wilder, L., Devleeschauwer, B., Clays, E., De Buyser, S., Van der Heyden, J.,  
1408 Charafeddine, R. et al. The impact of multimorbidity patterns on health-related quality of  
1409 life in the general population: results of the Belgian Health Interview Survey. *Qual. Life*  
1410 *Res.* **31**, 551–565 (2022).
- 1411 7. Prados-Torres, A., Calderón-Larrañaga, A., Hanco-Saavedra, J., Poblador-Plou, B. &  
1412 van den Akker, M. Multimorbidity patterns: a systematic review. *J. Clin. Epidemiol.* **67**,  
1413 254–266 (2014).
- 1414 8. Holden, L., Scuffham, P. A., Hilton, M. F., Muspratt, A., Ng, S.-K. & Whiteford, H. A.  
1415 Patterns of multimorbidity in working Australians. *Popul. Health Metr.* **9**, 15 (2011).
- 1416 9. Ng, S. K., Holden, L. & Sun, J. Identifying comorbidity patterns of health conditions via  
1417 cluster analysis of pairwise concordance statistics. *Stat. Med.* **31**, 3393–3405 (2012).
- 1418 10. Guisado-Clavero, M., Roso-Llorach, A., López-Jimenez, T., Pons-Vigués, M., Foguet-

- 1419 Boreu, Q., Muñoz, M. A. et al. Multimorbidity patterns in the elderly: a prospective cohort  
1420 study with cluster analysis. *BMC Geriatr.* **18**, 16 (2018).
- 1421 11. Dong, G., Feng, J., Sun, F., Chen, J. & Zhao, X.-M. A global overview of genetically  
1422 interpretable multimorbidities among common diseases in the UK Biobank. *Genome*  
1423 *Med.* **13**, 110 (2021).
- 1424 12. Shang, X., Zhang, X., Huang, Y., Zhu, Z., Zhang, X., Liu, J. et al. Association of a wide  
1425 range of individual chronic diseases and their multimorbidity with brain volumes in the  
1426 UK Biobank: A cross-sectional study. *EClinicalMedicine* **47**, 101413 (2022).
- 1427 13. Ronaldson, A., Arias de la Torre, J., Bendayan, R., Yadegarfar, M. E., Rhead, R.,  
1428 Douiri, A. et al. Physical multimorbidity, depressive symptoms, and social participation in  
1429 adults over 50 years of age: findings from the English Longitudinal Study of Ageing.  
1430 *Aging Ment. Health* 1–11 (2022) doi:10.1080/13607863.2021.2017847.
- 1431 14. Schramm, S., Møller, S. P., Tolstrup, J. S. & Laursen, B. Effects of individual and  
1432 parental educational levels on multimorbidity classes: a register-based longitudinal  
1433 study in a Danish population. *BMJ Open* vol. 12 e053274 (2022).
- 1434 15. Rajoo, S. S., Wee, Z. J., Lee, P. S. S., Wong, F. Y. & Lee, E. S. A Systematic Review of  
1435 the Patterns of Associative Multimorbidity in Asia. *Biomed Res. Int.* **2021**, 6621785  
1436 (2021).
- 1437 16. Zemedikun, D. T., Gray, L. J., Khunti, K., Davies, M. J. & Dhalwani, N. N. Patterns of  
1438 Multimorbidity in Middle-Aged and Older Adults: An Analysis of the UK Biobank Data.  
1439 *Mayo Clin. Proc.* **93**, 857–866 (2018).
- 1440 17. Ronaldson, A., Arias de la Torre, J., Prina, M., Armstrong, D., Das-Munshi, J., Hatch, S.  
1441 et al. Associations between physical multimorbidity patterns and common mental health  
1442 disorders in middle-aged adults: A prospective analysis using data from the UK  
1443 Biobank. *Lancet Reg Health Eur* **8**, 100149 (2021).
- 1444 18. Bycroft, C., Freeman, C., Petkova, D., Band, G., Elliott, L. T., Sharp, K. et al. The UK  
1445 Biobank resource with deep phenotyping and genomic data. *Nature* **562**, 203–209

- 1446 (2018).
- 1447 19. Chen, Z., Chen, J., Collins, R., Guo, Y., Peto, R., Wu, F. et al. China Kadoorie Biobank  
1448 of 0.5 million people: survey methods, baseline characteristics and long-term follow-up.  
1449 *International Journal of Epidemiology* vol. 40 1652–1666 (2011).
- 1450 20. Kanai, M., Akiyama, M., Takahashi, A., Matoba, N., Momozawa, Y., Ikeda, M. et al.  
1451 Genetic analysis of quantitative traits in the Japanese population links cell types to  
1452 complex human diseases. *Nat. Genet.* **50**, 390–400 (2018).
- 1453 21. Cotsapas, C., Voight, B. F., Rossin, E., Lage, K., Neale, B. M., Wallace, C. et al.  
1454 Pervasive sharing of genetic effects in autoimmune disease. *PLoS Genet.* **7**, e1002254  
1455 (2011).
- 1456 22. Bhattacharjee, S., Rajaraman, P., Jacobs, K. B., Wheeler, W. A., Melin, B. S., Hartge,  
1457 P. et al. A subset-based approach improves power and interpretation for the combined  
1458 analysis of genetic association studies of heterogeneous traits. *Am. J. Hum. Genet.* **90**,  
1459 821–835 (2012).
- 1460 23. Zhu, X., Feng, T., Tayo, B. O., Liang, J., Young, J. H., Franceschini, N. et al. Meta-  
1461 analysis of correlated traits via summary statistics from GWASs with an application in  
1462 hypertension. *Am. J. Hum. Genet.* **96**, 21–36 (2015).
- 1463 24. van der Sluis, S., Posthuma, D. & Dolan, C. V. TATES: efficient multivariate genotype-  
1464 phenotype analysis for genome-wide association studies. *PLoS Genet.* **9**, e1003235  
1465 (2013).
- 1466 25. Trochet, H., Pirinen, M., Band, G., Jostins, L., McVean, G. & Spencer, C. C. A.  
1467 Bayesian meta-analysis across genome-wide association studies of diverse  
1468 phenotypes. *Genet. Epidemiol.* **43**, 532–547 (2019).
- 1469 26. Majumdar, A., Haldar, T., Bhattacharya, S. & Witte, J. S. An efficient Bayesian meta-  
1470 analysis approach for studying cross-phenotype genetic associations. *PLoS Genet.* **14**,  
1471 e1007139 (2018).
- 1472 27. Turley, P., Walters, R. K., Maghziyan, O., Okbay, A., Lee, J. J., Fontana, M. A. et al.

- 1473 Multi-trait analysis of genome-wide association summary statistics using MTAG. *Nat.*  
1474 *Genet.* **50**, 229–237 (2018).
- 1475 28. O'Reilly, P. F., Hoggart, C. J., Pomyen, Y., Calboli, F. C. F., Elliott, P., Jarvelin, M.-R. et  
1476 al. MultiPhen: joint model of multiple phenotypes can increase discovery in GWAS.  
1477 *PLoS One* **7**, e34861 (2012).
- 1478 29. Jostins, L. & McVean, G. Trinculo: Bayesian and frequentist multinomial logistic  
1479 regression for genome-wide association studies of multi-category phenotypes.  
1480 *Bioinformatics* **32**, 1898–1900 (2016).
- 1481 30. Hartley, S. W. & Sebastiani, P. PleioGRiP: genetic risk prediction with pleiotropy.  
1482 *Bioinformatics* **29**, 1086–1088 (2013).
- 1483 31. Stephens, M. A unified framework for association analysis with multiple related  
1484 phenotypes. *PLoS One* **8**, e65245 (2013).
- 1485 32. Joo, J. W. J., Kang, E. Y., Org, E., Furlotte, N., Parks, B., Hormozdiari, F. et al. Efficient  
1486 and Accurate Multiple-Phenotype Regression Method for High Dimensional Data  
1487 Considering Population Structure. *Genetics* **204**, 1379–1390 (2016).
- 1488 33. Liu, J., Pei, Y., Papasian, C. J. & Deng, H.-W. Bivariate association analyses for the  
1489 mixture of continuous and binary traits with the use of extended generalized estimating  
1490 equations. *Genet. Epidemiol.* **33**, 217–227 (2009).
- 1491 34. Liu, L., Tang, L., Dong, W., Yao, S. & Zhou, W. An overview of topic modeling and its  
1492 current applications in bioinformatics. *Springerplus* **5**, 1608 (2016).
- 1493 35. Lee, M., Liu, Z., Kelly, R. & Tong, W. Of text and gene--using text mining methods to  
1494 uncover hidden knowledge in toxicogenomics. *BMC Syst. Biol.* **8**, 93 (2014).
- 1495 36. Bicego, M., Lovato, P., Perina, A., Fasoli, M., Delledonne, M., Pezzotti, M. et al.  
1496 Investigating topic models' capabilities in expression microarray data classification.  
1497 *IEEE/ACM Trans. Comput. Biol. Bioinform.* **9**, 1831–1836 (2012).
- 1498 37. McCoy, T. H., Castro, V. M., Snapper, L. A., Hart, K. L. & Perlis, R. H. Efficient genome-  
1499 wide association in biobanks using topic modeling identifies multiple novel disease loci.

- 1500 *Mol. Med.* **23**, 285–294 (2017).
- 1501 38. McCoy, T. H., Castro, V. M., Snapper, L., Hart, K., Januzzi, J. L., Huffman, J. C. et al.  
1502 Polygenic loading for major depression is associated with specific medical comorbidity.  
1503 *Transl. Psychiatry* **7**, e1238 (2017).
- 1504 39. McCoy, T. H., Jr, Pellegrini, A. M. & Perlis, R. H. Using phenome-wide association to  
1505 investigate the function of a schizophrenia risk locus at SLC39A8. *Transl. Psychiatry* **9**,  
1506 45 (2019).
- 1507 40. Zhao, J., Feng, Q., Wu, P., Warner, J. L., Denny, J. C. & Wei, W.-Q. Using topic  
1508 modeling via non-negative matrix factorization to identify relationships between genetic  
1509 variants and disease phenotypes: A case study of Lipoprotein(a) (LPA). *PLoS One* **14**,  
1510 e0212112 (2019).
- 1511 41. Lumbreras, A., Filstroff, L. & Févotte, C. Bayesian mean-parameterized nonnegative  
1512 binary matrix factorization. *Data Min. Knowl. Discov.* **34**, 1898–1935 (2020).
- 1513 42. Andrzejewski, D., Zhu, X. & Craven, M. Incorporating Domain Knowledge into Topic  
1514 Modeling via Dirichlet Forest Priors. *Proc. Int. Conf. Mach. Learn.* **382**, 25–32 (2009).
- 1515 43. Hu, Y., Boyd-Graber, J., Satinoff, B. & Smith, A. Interactive topic modeling. *Mach.*  
1516 *Learn.* **95**, 423–469 (2014).
- 1517 44. Li, C., Rana, S., Phung, D. & Venkatesh, S. Hierarchical Bayesian nonparametric  
1518 models for knowledge discovery from electronic medical records. *Knowledge-Based*  
1519 *Systems* **99**, 168–182 (2016).
- 1520 45. Cortes, A., Dendrou, C. A., Motyer, A., Jostins, L., Vukcevic, D., Dilthey, A. et al.  
1521 Bayesian analysis of genetic association across tree-structured routine healthcare data  
1522 in the UK Biobank. *Nat. Genet.* **49**, 1311–1318 (2017).
- 1523 46. Choi, E., Bahadori, M. T., Song, L., Stewart, W. F. & Sun, J. GRAM: Graph-based  
1524 Attention Model for Healthcare Representation Learning. *KDD* **2017**, 787–795 (2017).
- 1525 47. Cao, J., Xia, T., Li, J., Zhang, Y. & Tang, S. A density-based method for adaptive LDA  
1526 model selection. *Neurocomputing* vol. 72 1775–1781 (2009).

- 1527 48. Wallach, H. M., Murray, I., Salakhutdinov, R. & Mimno, D. Evaluation methods for topic  
1528 models. *Proceedings of the 26th Annual International Conference on Machine Learning*  
1529 - *ICML '09* (2009) doi:10.1145/1553374.1553515.
- 1530 49. Carrasco, M. V., Manolopoulou, I., O'Sullivan, J., Prior, R. & Musolesi, M. Posterior  
1531 summaries of grocery retail topic models: Evaluation, interpretability and credibility.  
1532 *Journal of the Royal Statistical Society: Series C (Applied Statistics)* (2022)  
1533 doi:10.1111/rssc.12546.
- 1534 50. Wallach, H., Mimno, D. & McCallum, A. Rethinking LDA: Why Priors Matter. in  
1535 *Advances in Neural Information Processing Systems* (eds. Bengio, Y., Schuurmans, D.,  
1536 Lafferty, J., Williams, C. & Culotta, A.) vol. 22 (Curran Associates, Inc., 2009).
- 1537 51. Minka, T. Estimating a Dirichlet distribution.  
1538 <https://vismod.media.mit.edu/pub/tpminka/papers/minka-dirichlet.ps.gz>.
- 1539 52. Islam, M. M., Valderas, J. M., Yen, L., Dawda, P., Jowsey, T. & McRae, I. S.  
1540 Multimorbidity and comorbidity of chronic diseases among the senior Australians:  
1541 prevalence and patterns. *PLoS One* **9**, e83783 (2014).
- 1542 53. Griffiths, T. L. & Steyvers, M. Finding scientific topics. *Proceedings of the National*  
1543 *Academy of Sciences* vol. 101 5228–5235 (2004).
- 1544 54. Eckel, R. H., Grundy, S. M. & Zimmet, P. Z. The metabolic syndrome. *Lancet* **365**,  
1545 1415–1428 (2005).
- 1546 55. Cornier, M.-A., Dabelea, D., Hernandez, T. L., Lindstrom, R. C., Steig, A. J., Stob, N. R.  
1547 et al. The metabolic syndrome. *Endocr. Rev.* **29**, 777–822 (2008).
- 1548 56. MacArthur, J., Bowler, E., Cerezo, M., Gil, L., Hall, P., Hastings, E. et al. The new  
1549 NHGRI-EBI Catalog of published genome-wide association studies (GWAS Catalog).  
1550 *Nucleic Acids Res.* **45**, D896–D901 (2017).
- 1551 57. Ernst, J. & Kellis, M. ChromHMM: automating chromatin-state discovery and  
1552 characterization. *Nat. Methods* **9**, 215–216 (2012).
- 1553 58. Ng, S. K., Tawiah, R., Sawyer, M. & Scuffham, P. Patterns of multimorbid health

- 1554 conditions: a systematic review of analytical methods and comparison analysis. *Int. J.*  
1555 *Epidemiol.* **47**, 1687–1704 (2018).
- 1556 59. Bisquera, A., Gulliford, M., Dodhia, H., Ledwaba-Chapman, L., Durbaba, S., Soley-Bori,  
1557 M. et al. Identifying longitudinal clusters of multimorbidity in an urban setting: A  
1558 population-based cross-sectional study. *The Lancet Regional Health - Europe* vol. 3  
1559 100047 (2021).
- 1560 60. Blei, D. M., Ng, A. Y. & Jordan, M. I. Latent dirichlet allocation. *the Journal of machine*  
1561 *Learning research* **3**, 993–1022 (2003).
- 1562 61. Xu, C. & Su, Z. Identification of cell types from single-cell transcriptomes using a novel  
1563 clustering method. *Bioinformatics* **31**, 1974–1980 (2015).
- 1564 62. Que, X., Checconi, F., Petrini, F. & Gunnels, J. A. Scalable Community Detection with  
1565 the Louvain Algorithm. in *2015 IEEE International Parallel and Distributed Processing*  
1566 *Symposium* 28–37 (2015). doi:10.1109/IPDPS.2015.59.
- 1567 63. Bastarache, L. Using Phecodes for Research with the Electronic Health Record: From  
1568 PheWAS to PheRS. *Annu Rev Biomed Data Sci* **4**, 1–19 (2021).
- 1569 64. Bulik-Sullivan, B. K., Loh, P.-R., Finucane, H. K., Ripke, S., Yang, J., Schizophrenia  
1570 Working Group of the Psychiatric Genomics Consortium et al. LD Score regression  
1571 distinguishes confounding from polygenicity in genome-wide association studies. *Nat.*  
1572 *Genet.* **47**, 291–295 (2015).
- 1573 65. Heritability and Genetic Correlation. *GitHub* <https://github.com/bulik/ldsc>.
- 1574 66. Burdett, T., Hastings, E., Welter, D., SPOT, EMBL-EBI & NHGRI. GWAS Catalog.  
1575 <https://www.ebi.ac.uk/gwas/>.
- 1576 67. Cano-Gamez, E. & Trynka, G. From GWAS to Function: Using Functional Genomics to  
1577 Identify the Mechanisms Underlying Complex Diseases. *Front. Genet.* **11**, 424 (2020).
- 1578 68. Watanabe, K., Taskesen, E., van Bochoven, A. & Posthuma, D. Functional mapping  
1579 and annotation of genetic associations with FUMA. *Nat. Commun.* **8**, 1826 (2017).
- 1580 69. Functional Mapping and Annotation of Genome-wide association studies.



- 1581 <https://fuma.ctglab.nl/>.
- 1582 70. GEO Accession viewer.
- 1583 <https://www.ncbi.nlm.nih.gov/geo/query/acc.cgi?acc=GSE87112>.
- 1584 71. GTEx Portal. <https://www.gtexportal.org/home/>.
- 1585 72. Euesden, J., Lewis, C. M. & O'Reilly, P. F. PRSice: Polygenic Risk Score software.
- 1586 *Bioinformatics* **31**, 1466–1468 (2015).
